# Supplementary material for: Usefulness of the C2HEST Score in Predicting the Clinical Outcomes of COVID-19 in Diabetic and Non-Diabetic Cohorts
Source: MDPI journal article supplement (doi:10.3390/jcm11030873), 2022-02-07
Supplement: s1 [file s1]

## Supplementary Tables

**Supplementary Table S1.** Baseline characteristics of the diabetic and non-diabetic cohort - treatment applied before hospitalization

| Treatment applied before hospitalization                        | Low risk [0-1] |                     | Medium [2-3]    |                     | High risk $\geq 4$ |                     | ANOVA P value         |              | P value for post-hoc analysis in significant ANOVA<br>L-M a<br>L-H b<br>M-H c |                                                                      |
|-----------------------------------------------------------------|----------------|---------------------|-----------------|---------------------|--------------------|---------------------|-----------------------|--------------|-------------------------------------------------------------------------------|----------------------------------------------------------------------|
|                                                                 | Diabetes N=209 | Non-Diabetes N=1183 | Diabetes N= 146 | Non-Diabetes N= 337 | Diabetes N=118     | Non-Diabetes N= 146 | Diabetes              | Non-Diabetes | Diabetes                                                                      | Non-Diabetes                                                         |
| <b>ACEI,</b><br>n<br>n (%)                                      | 49<br>(23,4)   | 64<br>(5,4)         | 38<br>(26,0)    | 80<br>(23,7)        | 48<br>(40,7)       | 60<br>(41,1)        | 0,003                 | <0.0001      | 1 <sup>a</sup><br>0,0049 <sup>b</sup><br>0,0501 <sup>c</sup>                  | <0.0001 <sup>a</sup><br><0.0001 <sup>b</sup><br>0,00053 <sup>c</sup> |
| <b>ARB,</b><br>n<br>n (%)                                       | 24<br>(11,5)   | 51<br>(4,3)         | 9<br>(6,2)      | 29<br>(8,6)         | 12<br>(10,2)       | 17<br>(11,6)        | 0,2342                | <0.0001      | N/A                                                                           | 0,0088 <sup>a</sup><br>0,00097 <sup>b</sup><br>1 <sup>c</sup>        |
| <b>MRA,</b><br>n<br>n (%)                                       | 7<br>(3,3)     | 11<br>(0,9)         | 13<br>(8,9)     | 18<br>(5,3)         | 24<br>(20,3)       | 23<br>(15,8)        | <0.0001               | <0.0001      | 0,1366 <sup>a</sup><br><0.0001 <sup>b</sup><br>0,0391 <sup>c</sup>            | <0.0001 <sup>a</sup><br><0.0001 <sup>b</sup><br>0,00095 <sup>c</sup> |
| <b><math>\beta</math>-blocker</b><br>n<br>n (%)                 | 70<br>(33,5)   | 123<br>(10,4)       | 70<br>(47,9)    | 105<br>(31,2)       | 72<br>(61,0)       | 79<br>(54,1)        | <0.0001               | <0.0001      | 0,0255 <sup>a</sup><br><0.0001 <sup>b</sup><br>0,1385 <sup>c</sup>            | <0.0001 <sup>a</sup><br><0.0001 <sup>b</sup><br><0.0001 <sup>c</sup> |
| <b>Calcium channel blocker (dihydropiridines)</b><br>n<br>n (%) | 41<br>(19,6)   | 61<br>(5,2)         | 30<br>(20,5)    | 52<br>(15,4)        | 35<br>(29,7)       | 37<br>(25,3)        | 0,0909                | <0.0001      | N/A                                                                           | <0.0001 <sup>a</sup><br><0.0001 <sup>b</sup><br>0,0425 <sup>c</sup>  |
| <b><math>\alpha</math>-adrenergic blocker,</b><br>n<br>n (%)    | 20<br>(9,6)    | 25<br>(2,1)         | 9<br>(6,2)      | 24<br>(7,1)         | 20<br>(16,9)       | 18<br>(12,3)        | 0,0148                | <0.0001      | N/A                                                                           | <0.0001 <sup>a</sup><br><0.0001 <sup>b</sup><br>0,2735 <sup>c</sup>  |
| <b>Amiodarone</b><br>n<br>n (%)                                 | 1<br>(0,5)     | 0<br>(0,0)          | 1<br>(0,7)      | 1<br>(0,3)          | 1<br>(0,8)         | 0<br>(0,0)          | 1                     | 0,29         | N/A                                                                           | N/A                                                                  |
| <b>Thiazide or thiazide-like diuretic</b><br>n<br>n (%)         | 28<br>(13,4)   | 38<br>(3,2)         | 18<br>(12,3)    | 28<br>(8,3)         | 16<br>(13,6)       | 16<br>(11,0)        | 0,9444                | <0.0001      | N/A                                                                           | 0,00029 <sup>a</sup><br><0.0001 <sup>b</sup><br>1 <sup>c</sup>       |
| <b>Loop diuretic,</b><br>n<br>n (%)                             | 17<br>(8,1)    | 22<br>(1,9)         | 26<br>(17,8)    | 37<br>(11,0)        | 46<br>(39,0)       | 29<br>(19,9)        | <0.0001               | <0.0001      | 0,0293 <sup>a</sup><br><0.0001 <sup>b</sup><br>0,00064 <sup>a</sup>           | <0.0001 <sup>a</sup><br><0.0001 <sup>b</sup><br>0,041 <sup>c</sup>   |
| <b>Statin,</b><br>n<br>n (%)                                    | 46<br>(22,0)   | 54<br>(4,6)         | 47<br>(32,2)    | 69<br>(20,5)        | 58<br>(49,2)       | 61<br>(41,8)        | <0.0001               | <0.0001      | 0,1288 <sup>a</sup><br><0.0001 <sup>b</sup><br>0,0226 <sup>c</sup>            | <0.0001 <sup>a</sup><br><0.0001 <sup>b</sup><br><0.0001 <sup>c</sup> |
| <b>Acetylsalicylic acid,</b><br>n<br>n (%)                      | 35<br>(16,7)   | 44<br>(3,7)         | 38<br>(26,0)    | 53<br>(15,7)        | 39<br>(33,1)       | 37<br>(25,3)        | 2,83x10 <sup>-3</sup> | <0.0001      | 0,138 <sup>a</sup><br>0,0035 <sup>b</sup><br>0,7983 <sup>c</sup>              | <0.0001 <sup>a</sup><br><0.0001 <sup>b</sup><br>0,0541 <sup>c</sup>  |
| <b>The second antiplatelet drug,</b><br>n<br>n (%)              | 4<br>(1,9)     | 3<br>(0,3)          | 3<br>(2,1)      | 7<br>(2,1)          | 14<br>(11,9)       | 6<br>(4,1)          | <0.0001               | <0.0001      | 1 <sup>a</sup><br>0,0012 <sup>b</sup><br>0,0088 <sup>c</sup>                  | 0,0057 <sup>a</sup><br>0,00011 <sup>b</sup><br>0,8205 <sup>c</sup>   |
| <b>LMWH</b><br>n<br>n (%)                                       | 17<br>(8,1)    | 56<br>(4,7)         | 15<br>(10,3)    | 25<br>(7,4)         | 8<br>(6,8)         | 16<br>(11,0)        | 0,5829                | 0,0038       | N/A                                                                           | 0,2164 <sup>a</sup><br>0,0098 <sup>b</sup><br>0,8083 <sup>c</sup>    |
| <b>VKA,</b><br>n<br>n (%)                                       | 1<br>(0,5)     | 9<br>(0,8)          | 4<br>(2,7)      | 8<br>(2,4)          | 11<br>(9,3)        | 10<br>(6,8)         | 0,00018               | <0.0001      | 0,4912 <sup>a</sup><br>0,00025 <sup>b</sup><br>0,0915 <sup>c</sup>            | 0,1002 <sup>a</sup><br><0.0001 <sup>b</sup><br>0,0971 <sup>c</sup>   |
| <b>NOAC,</b><br>n<br>n (%)                                      | 8<br>(3,8)     | 9<br>(0,8)          | 10<br>(6,8)     | 26<br>(7,7)         | 25<br>(21,2)       | 25<br>(17,1)        | <0.0001               | <0.0001      | 0,907558 <sup>a</sup><br><0.0001 <sup>b</sup><br>0,0037 <sup>c</sup>          | <0.0001 <sup>a</sup><br><0.0001 <sup>b</sup><br>0,0102 <sup>c</sup>  |
| <b>Insulin,</b><br>n<br>n (%)                                   | 57<br>(27,3)   | 2<br>(0,2)          | 27<br>(18,5)    | 2<br>(0,6)          | 39<br>(33,1)       | 1<br>(0,7)          | 0,0235                | 0,17708      | 0,2212 <sup>a</sup><br>0,988 <sup>b</sup><br>0,0303 <sup>c</sup>              | N/A                                                                  |
| <b>Metformin,</b><br>n<br>n (%)                                 | 98<br>(46,9)   | 2<br>(0,2)          | 58<br>(39,7)    | 7<br>(2,1)          | 48<br>(40,7)       | 1<br>(0,7)          | 0,335615              | 0,0008       | N/A                                                                           | 0,0018 <sup>a</sup><br>0,8847 <sup>b</sup><br>1 <sup>c</sup>         |
| <b>SGLT2 inhibitor</b><br>n<br>n (%)                            | 11<br>(5,3)    | 0<br>(0,0)          | 5<br>(3,4)      | 2<br>(0,6)          | 9<br>(7,6)         | 0<br>(0,0)          | 0,31623               | 0,083928     | N/A                                                                           | N/A                                                                  |

|                                                                                   |              |             |              |              |              |              |          |          |                                                                     |                                                                     |
|-----------------------------------------------------------------------------------|--------------|-------------|--------------|--------------|--------------|--------------|----------|----------|---------------------------------------------------------------------|---------------------------------------------------------------------|
| <b>Oral antidiabetics other than SGLT2 inhibitor and metformin,</b><br>n<br>n (%) | 26<br>(12,4) | 1<br>(0,1)  | 31<br>(21,2) | 3<br>(0,9)   | 25<br>(21,2) | 2<br>(1,4)   | 0,0436   | 0,0065   | 0,1144 <sup>a</sup><br>0,159 <sup>b</sup><br>1 <sup>c</sup>         | 0,1084 <sup>a</sup><br>0,1001 <sup>b</sup><br>1 <sup>c</sup>        |
| <b>Proton pump inhibitor,</b><br>n<br>n (%)                                       | 27<br>(12,9) | 61<br>(5,2) | 28<br>(19,2) | 42<br>(12,5) | 43<br>(36,4) | 35<br>(24,0) | <0.0001  | <0.0001  | 0,4372 <sup>a</sup><br><0.0001 <sup>b</sup><br>0,00796 <sup>c</sup> | <0.0001 <sup>a</sup><br><0.0001 <sup>b</sup><br>0,0071 <sup>c</sup> |
| <b>Oral corticosteroid</b><br>n<br>n (%)                                          | 13<br>(6,2)  | 48<br>(4,1) | 8<br>(5,5)   | 16<br>(4,7)  | 4<br>(3,4)   | 1<br>(0,7)   | 0,542619 | 0,093044 | N/A                                                                 | N/A                                                                 |
| <b>Immunosuppression other than oral corticosteroid,</b><br>n<br>n (%)            | 11<br>(5,3)  | 37<br>(3,1) | 5<br>(3,4)   | 17<br>(5,0)  | 2<br>(1,7)   | 0<br>(0,0)   | 0,263014 | 0,00661  | N/A                                                                 | 0,291 <sup>a</sup><br>0,0836 <sup>b</sup><br>0,00753 <sup>c</sup>   |

**Supplementary Table S2.** Laboratory parameters measured during the hospitalisation in the diabetic and non-diabetic cohort.

| Parameter                          | Time of assessment  | Units                         | Low risk<br>[0-1]<br>n=209 |                         | Medium<br>[2-3]<br>n=146 |                        | High risk<br>[≥4]<br>n=118 |                        | ANOVA<br>P value |              | P value for<br>post-hoc analysis in<br>significant ANOVA<br>L-M <sup>a</sup><br>L-H <sup>b</sup><br>M-H <sup>c</sup> |                                                                    |
|------------------------------------|---------------------|-------------------------------|----------------------------|-------------------------|--------------------------|------------------------|----------------------------|------------------------|------------------|--------------|----------------------------------------------------------------------------------------------------------------------|--------------------------------------------------------------------|
|                                    |                     |                               | Diabetes<br>n=209          | Non-Diabetes            | Diabetes<br>n=146        | Non-Diabetes           | Diabetes<br>n=118          | Non-Diabetes           | Diabetes         | Non-Diabetes | Diabetes                                                                                                             | Non-Diabetes                                                       |
| <b>Leucocytes</b><br>n (%)<br>(N)  | <b>On admission</b> | >12<br>x10 <sup>3</sup> /μl   | n=38<br>18,7<br>(203)      | n=159<br>14,8<br>(1073) | n=29<br>20,1<br>(144)    | n=53<br>16,2<br>(327)  | n=26<br>22,4<br>(116)      | n=26<br>18,3<br>(142)  | 0,9091           | 0,6033       | N/A                                                                                                                  | N/A                                                                |
|                                    |                     | 4-12<br>x10 <sup>3</sup> /μl  | n=149<br>73,4<br>(203)     | n=802<br>74,7<br>(1073) | n=106<br>73,6<br>(144)   | n=233<br>71,3<br>(327) | n=81<br>69,8<br>(116)      | n=101<br>71,1<br>(142) |                  |              |                                                                                                                      |                                                                    |
|                                    |                     | <4 x10 <sup>3</sup> /μl       | n=16<br>7,9<br>(203)       | n=112<br>10,4<br>(1073) | n=9<br>6,3<br>(144)      | n=41<br>12,5<br>(327)  | n=9<br>7,8<br>(116)        | n=15<br>10,6<br>(142)  |                  |              |                                                                                                                      |                                                                    |
|                                    | <b>On discharge</b> | >12<br>x10 <sup>3</sup> /μl   | n=44<br>21,7<br>(203)      | n=154<br>14,4<br>(1073) | n=37<br>25,7<br>(144)    | n=64<br>19,6<br>(327)  | n=28<br>24,1<br>(116)      | n=35<br>24,6<br>(142)  | 0,6562           | 0,0003       | N/A                                                                                                                  | 0,0043 <sup>a</sup><br>0,019 <sup>b</sup><br>0,409 <sup>c</sup>    |
|                                    |                     | 4-12<br>x10 <sup>3</sup> /μl  | n=145<br>71,4<br>(203)     | n=849<br>79,1<br>(1073) | n=102<br>70,8<br>(144)   | n=228<br>69,7<br>(327) | n=81<br>69,8<br>(116)      | n=99<br>39,7<br>(142)  |                  |              |                                                                                                                      |                                                                    |
|                                    |                     | <4 x10 <sup>3</sup> /μl       | n=14<br>6,9<br>(203)       | n=70<br>6,5<br>(1073)   | n=5<br>3,5<br>(144)      | n=35<br>10,7<br>(327)  | n=7<br>6,0<br>(116)        | n=8<br>5,6<br>(142)    |                  |              |                                                                                                                      |                                                                    |
| <b>Lymphocytes</b><br>n (%)<br>(N) | <b>On admission</b> | <1 x10 <sup>3</sup> /μl,      | n=70<br>45,8<br>(153)      | n=310<br>51,7<br>(600)  | n=54<br>51,0<br>(106)    | n=118<br>53,2<br>(222) | n=48<br>54,5<br>(88)       | n=66<br>62,3<br>(106)  | 0,3773           | 0,131        | N/A                                                                                                                  | N/A                                                                |
|                                    |                     | 1-5 10 <sup>3</sup> /μl       | n=80<br>53,2<br>(153)      | n=286<br>47,7<br>(600)  | n=52<br>49,1<br>(106)    | n=100<br>45,0<br>(222) | n=40<br>45,5<br>(88)       | n=39<br>36,8<br>(106)  |                  |              |                                                                                                                      |                                                                    |
|                                    |                     | >5 x10 <sup>3</sup> /μl       | n=3<br>2,0<br>(153)        | n=4<br>0,7<br>(600)     | n=0<br>0<br>(106)        | n=4<br>1,8<br>(222)    | n=0<br>0<br>(88)           | n=1<br>0,9<br>(106)    |                  |              |                                                                                                                      |                                                                    |
| <b>n (%)</b><br>(N)                | <b>On discharge</b> | <1 x10 <sup>3</sup> /μl,      | n=39<br>25,5<br>(153)      | n=136<br>22,7<br>(600)  | n=44<br>41,5<br>(106)    | n=67<br>30,2<br>(222)  | n=48<br>54,5<br>(88)       | n=57<br>53,8<br>(106)  | <0.0001          | <0.0001      | 0,0272 <sup>a</sup><br><0.0001 <sup>b</sup><br>0,0929 <sup>c</sup>                                                   | 0,0895 <sup>a</sup><br><0.0001 <sup>b</sup><br>0,0003 <sup>c</sup> |
|                                    |                     | 1-5 10 <sup>3</sup> /μl       | n=212<br>73,2<br>(153)     | n=457<br>76,2<br>(600)  | n=62<br>58,5<br>(106)    | n=150<br>67,6<br>(222) | n=38<br>43,2<br>(88)       | n=48<br>45,3<br>(106)  |                  |              |                                                                                                                      |                                                                    |
|                                    |                     | >5 x10 <sup>3</sup> /μl       | n=2<br>1,3<br>(153)        | n=7<br>1,2<br>(600)     | n=0<br>0<br>(106)        | n=5<br>2,3<br>(222)    | n=2<br>2,3<br>(88)         | n=1<br>0,9<br>(106)    |                  |              |                                                                                                                      |                                                                    |
| <b>Neutrophils</b><br>n (%)<br>(N) | <b>On admission</b> | <1,5<br>x10 <sup>3</sup> /μl  | n=3<br>2,0<br>(153)        | n=18<br>3,0<br>(601)    | n=2<br>1,9<br>(107)      | n=7<br>3,1<br>(223)    | n=3<br>3,4<br>(88)         | n=2<br>1,9<br>(106)    | 0,6073           | 0,973        | N/A                                                                                                                  | N/A                                                                |
|                                    |                     | 1,5-<br>8x10 <sup>3</sup> /μl | n=108<br>70,6<br>(153)     | n=434<br>72,2<br>(601)  | n=67<br>62,6<br>(107)    | n=163<br>73,1<br>(223) | n=59<br>67,0<br>(88)       | n=76<br>71,7<br>(106)  |                  |              |                                                                                                                      |                                                                    |
|                                    |                     | >8 x10 <sup>3</sup> /μl       | n=42<br>27,5<br>(153)      | n=149<br>24,8<br>(601)  | n=38<br>35,5<br>(107)    | n=53<br>23,8<br>(223)  | n=26<br>29,5<br>(88)       | n=28<br>26,4<br>(106)  |                  |              |                                                                                                                      |                                                                    |
| <b>n (%)</b><br>(N)                | <b>On discharge</b> | <1,5<br>x10 <sup>3</sup> /μl  | n=5<br>3,3<br>(153)        | n=11<br>1,8<br>(601)    | n=1<br>0,9<br>(107)      | n=6<br>2,7<br>(223)    | n=2<br>2,3<br>(88)         | n=1<br>0,9<br>(106)    | 0,3634           | 0,0281       | N/A                                                                                                                  | 1 <sup>a</sup><br>0,021 <sup>b</sup><br>0,24 <sup>c</sup>          |
|                                    |                     | 1,5-<br>8x10 <sup>3</sup> /μl | n=106<br>69,3              | n=460<br>76,5           | n=66<br>61,7             | n=162<br>72,6          | n=55<br>62,5               | n=67<br>63,2           |                  |              |                                                                                                                      |                                                                    |

|                                                 |                 |                                                            |                                        |                                          |                                         |                                        |                                   |                                        |         |         |                                                                    |                                                                    |
|-------------------------------------------------|-----------------|------------------------------------------------------------|----------------------------------------|------------------------------------------|-----------------------------------------|----------------------------------------|-----------------------------------|----------------------------------------|---------|---------|--------------------------------------------------------------------|--------------------------------------------------------------------|
|                                                 |                 |                                                            | (153)                                  | (601)                                    | (107)                                   | (223)                                  | (88)                              | (106)                                  | <0.0001 | <0.0001 | 0,3006 <sup>a</sup><br><0.0001 <sup>b</sup><br>0,0016 <sup>c</sup> | <0.0001 <sup>a</sup><br><0.0001 <sup>b</sup><br>0,473 <sup>c</sup> |
|                                                 |                 | >8 x10 <sup>3</sup> /μl                                    | n=42<br>27,5<br>(153)                  | n=130<br>21,6<br>(601)                   | n=40<br>37,4<br>(107)                   | n=55<br>24,7<br>(223)                  | n=31<br>35,2<br>(88)              | n=38<br>35,8<br>(106)                  |         |         |                                                                    |                                                                    |
| Haemoglobi<br>n,<br>n (%)<br>(N)                | On<br>admission | <12 g/dl –<br>females,<br><13 g/dl –<br>males<br>(anaemia) | n=74<br>36,5<br>(203)                  | n=268<br>25,0<br>(1073)                  | n=66<br>45,8<br>(144)                   | n=123<br>37,6<br>(327)                 | n=79<br>68,1<br>(116)             | n=64<br>45,1<br>(142)                  |         |         |                                                                    |                                                                    |
|                                                 |                 | ≥12 g/dl F<br>≥13 g/dl M                                   | n=129<br>63,5<br>(203)                 | n=805<br>75,0<br>(1073)                  | n=78<br>54,2<br>(144)                   | n=204<br>62,4<br>(327)                 | n=37<br>31,9<br>(116)             | n=78<br>54,9<br>(142)                  | 0,00016 | <0.0001 | 1 <sup>a</sup><br>0,0002 <sup>b</sup><br>0,01 <sup>c</sup>         | <0.0001<br>0,0003 <sup>b</sup><br>1,0 <sup>c</sup>                 |
| n (%)<br>(N)                                    | On<br>discharge | <12 g/dl –<br>females,<br><13 g/dl –<br>males<br>(anaemia) | n=110<br>54,2<br>(203)                 | n=387<br>36,1<br>(1073)                  | n=86<br>59,7<br>(144)                   | n=166<br>50,8<br>(327)                 | n=90<br>77,6<br>(116)             | n=76<br>53,5<br>(142)                  |         |         |                                                                    |                                                                    |
|                                                 |                 | ≥12 g/dl F<br>≥13 g/dl M                                   | n=93<br>45,8<br>(203)                  | n=686<br>63,9<br>(1073)                  | n=58<br>40,8<br>(144)                   | n=161<br>49,2<br>(327)                 | n=26<br>22,4<br>(116)             | n=66<br>46,5<br>(142)                  |         |         |                                                                    |                                                                    |
| Reticulocytes<br>mean±SD<br>min-max<br>(N)      | On<br>admission | x 10 <sup>9</sup> /L                                       | 56,8±34,4<br>4<br>8,1-137,6<br>(19)    | 60,4±33,69<br>5,3-132,7<br>(84)          | 57,0±27,79<br>19,0-109,7<br>(23)        | 55,0±38,39<br>10,1-224,4<br>(40)       | 61,2±40,46<br>4,5-142,3<br>(14)   | 58,2±32,4<br>16,4-123,3<br>(14)        | 0,937   | 0,753   | N/A                                                                | N/A                                                                |
| mean±SD<br>min-max<br>(N)                       | On<br>discharge | x 10 <sup>9</sup> /L                                       | 61,0±37,9<br>3<br>8,1-137,6<br>(203)   | 61,4±32,63<br>4,9-132,7<br>(84)          | 59,3±41,47<br>19,0-216,4<br>(23)        | 57,9±40,61<br>7-230,3<br>(40)          | 53,2±37,73<br>9,1-162,4<br>(14)   | 58,7±36,39<br>12,9-123,3<br>(14)       | 0,837   | 0,8817  | N/A                                                                | N/A                                                                |
| Platelets<br>mean±SD<br>min-max<br>(N)          | On<br>admission |                                                            | 243,6±10<br>0,91<br>0-565,0<br>(203)   | 234,6±110,7<br>1<br>4,0-1356,0<br>(1073) | 242,5±116,1<br>0<br>53,0-730,0<br>(144) | 224,7±112,3<br>5<br>3,0-740,0<br>(327) | 216,2±88,74<br>8,0-578,0<br>(116) | 215,6±96,6<br>4<br>15,0-537,0<br>(142) | 0,028   | 0,0586  | N/A                                                                | 0,995 <sup>a</sup><br>0,032 <sup>b</sup><br>0,098 <sup>c</sup>     |
| n (%)<br>(N)                                    |                 | >400 x10 <sup>3</sup><br>/μl                               | n=15<br>7,4<br>(203)                   | n=72<br>6,7<br>(1073)                    | n=12<br>8,3<br>(144)                    | n=22<br>6,7<br>(327)                   | n=4<br>3,4<br>(116)               | n=6<br>4,2<br>(142)                    | 0,225   | 0,0969  | N/A                                                                | N/A                                                                |
|                                                 |                 | 150-400<br>x10 <sup>3</sup> / μl                           | n=157<br>77,3<br>(203)                 | n=815<br>76,0<br>(1073)                  | n=104<br>72,2<br>(144)                  | n=234<br>71,6<br>(327)                 | n=86<br>74,1<br>(116)             | n=102<br>71,8<br>(142)                 |         |         |                                                                    |                                                                    |
|                                                 |                 | 100- 150<br>x10 <sup>3</sup> /μl                           | n=24<br>11,8<br>(203)                  | n=145<br>13,5<br>(1073)                  | n=20<br>13,9<br>(144)                   | n=48<br>14,7<br>(327)                  | n=20<br>17,2<br>(116)             | n=20<br>14,1<br>(142)                  |         |         |                                                                    |                                                                    |
|                                                 |                 | <100 x10 <sup>3</sup><br>/μl                               | n=7<br>3,4<br>(203)                    | n=6<br>0,6<br>(1073)                     | n=8<br>5,6<br>(144)                     | n=6<br>1,8<br>(327)                    | n=6<br>5,2<br>(116)               | n=3<br>2,1<br>(142)                    |         |         |                                                                    |                                                                    |
| mean±SD<br>min-max<br>(N)                       | On<br>discharge |                                                            | 267,9±13<br>2,63<br>6,0-691,0<br>(203) | 272,3±128,4<br>4<br>2,0-1101,0<br>(1071) | 252,1±116,1<br>15,0-606,0<br>(144)      | 241,9±122,9<br>3,0-694,0<br>(327)      | 211,4±98,04<br>4,0-592,0<br>(116) | 213,1±99,5<br>1<br>15,0-521,0<br>(142) | <0.0001 | <0.0001 | 0,465 <sup>a</sup><br><0.0001 <sup>b</sup><br>0,007 <sup>c</sup>   | 0,0004 <sup>a</sup><br><0.0001 <sup>b</sup><br>0,021 <sup>c</sup>  |
| n (%)<br>(N)                                    |                 | >400 x10 <sup>3</sup><br>/μl                               | n=36<br>17,7<br>(203)                  | n=159<br>14,8<br>(1071)                  | n=15<br>10,4<br>(144)                   | n=34<br>10,4<br>(327)                  | n=5<br>4,3<br>(116)               | n=5<br>3,5<br>(142)                    | 0,912   | <0.0001 | N/A                                                                | 0,0076 <sup>a</sup><br><0.0001 <sup>b</sup><br>0,2898 <sup>c</sup> |
|                                                 |                 | 150-400<br>x10 <sup>3</sup> / μl                           | n=133<br>65,5<br>(203)                 | n=768<br>71,7<br>(1071)                  | n=103<br>71,5<br>(144)                  | n=226<br>69,1<br>(327)                 | n=81<br>69,8<br>(116)             | n=96<br>67,6<br>(142)                  |         |         |                                                                    |                                                                    |
|                                                 |                 | 100-150<br>x10 <sup>3</sup> /μl                            | n=12<br>5,9<br>(203)                   | n=102<br>9,5<br>(1071)                   | n=14<br>9,7<br>(144)                    | n=36<br>11,0<br>(327)                  | n=18<br>15,5<br>(116)             | n=24<br>16,9<br>(142)                  |         |         |                                                                    |                                                                    |
|                                                 |                 | <100 x10 <sup>3</sup><br>/μl                               | n=22<br>10,8<br>(203)                  | n=16<br>1,5<br>(1071)                    | n=12<br>8,3<br>(144)                    | n=10<br>3,1<br>(327)                   | n=12<br>10,3<br>(116)             | n=5<br>3,5<br>(142)                    |         |         |                                                                    |                                                                    |
| Acid -base balance in the arterial blood<br>gas |                 |                                                            |                                        |                                          |                                         |                                        |                                   |                                        |         |         |                                                                    |                                                                    |
| PH<br>mean±SD<br>min-max<br>(N)                 | On<br>admission |                                                            | 7,42±0,09<br>7,19-7,58<br>(37)         | 7,43±0,08<br>7,04-7,57<br>(83)           | 7,42±0,06<br>7,29-7,53<br>(32)          | 7,43±0,07<br>7,10-7,54<br>(56)         | 7,39±0,09<br>7,09-7,52<br>(30)    | 7,43±0,06<br>7,26-7,54<br>(35)         | 0,293   | 0,866   | N/A                                                                | N/A                                                                |
| n (%)<br>(N)                                    |                 | <7.35,<br>(acidosis)                                       | n=6<br>16,2<br>(37)                    | n=8<br>9,6<br>(83)                       | n=3<br>9,4<br>(32)                      | n=4<br>7,1<br>(56)                     | n=7<br>23,3<br>(30)               | n=3<br>8,6<br>(35)                     | 0,332   | 0,9377  | N/A                                                                | N/A                                                                |
|                                                 |                 | ≥7.35                                                      | n=31<br>83,8<br>(37)                   | n=75<br>90,4<br>(83)                     | n=29<br>90,6<br>(32)                    | n=52<br>92,9<br>(56)                   | n=23<br>76,7<br>(30)              | n=32<br>91,4<br>(35)                   |         |         |                                                                    |                                                                    |
| mean±SD<br>min-max<br>(N)                       | On<br>discharge |                                                            | 7,42±0,08<br>7,16-7,54<br>(37)         | 7,42±0,08<br>7,06-7,54<br>(83)           | 7,42±0,06<br>7,30-7,54<br>(32)          | 7,43±0,08<br>7,01-7,55<br>(56)         | 7,42±0,06<br>7,33-7,56<br>(30)    | 7,42±0,06<br>7,25-7,52<br>(35)         | 0,979   | 0,8499  | N/A                                                                | N/A                                                                |
| n (%)<br>(N)                                    |                 | <7.35,<br>(acidosis)                                       | n=4<br>10,8<br>(37)                    | n=8<br>9,6<br>(83)                       | n=5<br>15,6<br>(32)                     | n=4<br>7,1<br>(56)                     | n=1<br>13,3<br>(30)               | n=3<br>8,6<br>(35)                     | 0,597   | 0,9377  | N/A                                                                | N/A                                                                |
|                                                 |                 | ≥7.35                                                      | n=33<br>89,2<br>(37)                   | n=75<br>90,4<br>(83)                     | n=27<br>84,4<br>(32)                    | n=52<br>92,9<br>(56)                   | n=29<br>96,7<br>(30)              | n=32<br>91,4<br>(35)                   |         |         | N/A                                                                | N/A                                                                |
| PaO2<br>mean±SD<br>min-max<br>(N)               | On<br>admission |                                                            | 70,8±33,2<br>0<br>23,5-<br>207,0       | 73,1±24,51<br>12,8-156,0<br>(83)         | 79,4±55,62<br>28,3-298,0<br>(32)        | 74,5±42,85<br>28,6-286,0<br>(56)       | 66,8±36,24<br>23,7-222,0<br>(30)  | 72,5±33,74<br>32,8-211,0<br>(35)       | 0,574   | 0,965   | N/A                                                                | N/A                                                                |

|                                               |                         |                                                                                                   |                                              |                                  |                                    |                                  |                                  |                                  |        |         |                                                                   |     |
|-----------------------------------------------|-------------------------|---------------------------------------------------------------------------------------------------|----------------------------------------------|----------------------------------|------------------------------------|----------------------------------|----------------------------------|----------------------------------|--------|---------|-------------------------------------------------------------------|-----|
|                                               |                         |                                                                                                   | (37)                                         |                                  |                                    |                                  |                                  |                                  |        |         |                                                                   |     |
| n (%)<br>(N)                                  |                         | <60<br>mmHg,<br>(respirator<br>y<br>insufficien<br>cy)                                            | n=13<br>35,1<br>(37)                         | n=24<br>28,9<br>(83)             | n=14<br>43,8<br>(32)               | n=19<br>33,9<br>(56)             | n=16<br>53,3<br>(30)             | n=14<br>40,0<br>(35)             | 0,327  | 0,491   | N/A                                                               | N/A |
|                                               |                         | ≥60<br>mmHg                                                                                       | n=24<br>64,9<br>(37)                         | n=59<br>71,1<br>(83)             | n=18<br>56,3<br>(32)               | n=37<br>66,1<br>(56)             | n=14<br>46,7<br>(30)             | n=21<br>60,0<br>(35)             |        |         |                                                                   |     |
| mean±SD<br>min-max<br>(N)                     | <b>On<br/>discharge</b> |                                                                                                   | 77,0±30,2<br>1<br>23,5-<br>207,0<br>(37)     | 74,8±25,02<br>12,8-165,0<br>(83) | 84,9±58,08<br>23,3-298,0<br>(32)   | 73,5±42,15<br>28,6-286,0<br>(56) | 61,7±19,56<br>31,8-114,0<br>(30) | 70,8±33,20<br>23,5-207,0<br>(35) | 0,015  | 0,5447  | 0,771 <sup>a</sup><br>0,04 <sup>b</sup><br>0,097 <sup>c</sup>     | N/A |
| n (%)<br>(N)                                  |                         | <60<br>mmHg,<br>(respirator<br>y<br>insufficien<br>cy)                                            | n=8<br>21,6<br>(37)                          | n=20<br>24,1<br>(83)             | n=12<br>37,5<br>(32)               | n=18<br>32,1<br>(56)             | n=18<br>60,0<br>(30)             | n=14<br>40,0<br>(35)             | 0,0057 | 0,20469 | 0,7096 <sup>a</sup><br>0,0094 <sup>b</sup><br>0,3875 <sup>c</sup> | N/A |
|                                               |                         | ≥60<br>mmHg                                                                                       | n=29<br>78,4<br>(37)                         | n=63<br>75,9<br>(83)             | n=20<br>62,5<br>(32)               | n=38<br>67,9<br>(56)             | n=12<br>40,0<br>(30)             | n=21<br>60,0<br>(35)             |        |         |                                                                   |     |
| PaCO2<br>mean±SD<br>min-max<br>(N)            | <b>On<br/>admission</b> |                                                                                                   | 36,7±9,80<br>20,2-61,4<br>(37)               | 38,7±10,51<br>25,7-82,4<br>(83)  | 36,4±8,67<br>20,9-67,0<br>(32)     | 36,8±9,89<br>25,4-79,4<br>(56)   | 38,2±10,13<br>25,7-74,9<br>(30)  | 38,9±11,99<br>19,7-88,4<br>(35)  | 0,741  | 0,5124  | N/A                                                               | N/A |
| n (%)<br>(N)                                  |                         | ≥ 45<br>mmHg,<br>(hypercap<br>nia)                                                                | n=7<br>18,9<br>(37)                          | n=16<br>19,3<br>(83)             | n=4<br>12,5<br>(32)                | n=6<br>10,7<br>(56)              | n=6<br>20,0<br>(30)              | n=6<br>17,1<br>(35)              | 0,691  | 0,3962  | N/A                                                               | N/A |
|                                               |                         | < 45<br>mmHg                                                                                      | n=30<br>81,1<br>(37)                         | n=67<br>80,7<br>(83)             | n=28<br>87,5<br>(32)               | n=50<br>89,3<br>(56)             | n=24<br>80,0<br>(30)             | n=29<br>82,9<br>(35)             |        |         |                                                                   |     |
| mean±SD<br>min-max<br>(N)                     | <b>On<br/>discharge</b> |                                                                                                   | 36,2±9,64<br>20,2-59,4<br>(37)               | 39,5±9,81<br>26,8-75,5<br>(83)   | 37,5±7,63<br>22,4-59,5<br>(32)     | 38,2±12,53<br>20,9-88,4<br>(56)  | 37,2±6,20<br>25,7-50,6<br>(30)   | 40,0±12,76<br>25,0-88,4<br>(35)  | 0,816  | 0,7567  | N/A                                                               | N/A |
| n (%)<br>(N)                                  |                         | ≥ 45<br>mmHg,<br>(hypercap<br>nia)                                                                | n=6<br>16,2<br>(37)                          | n=14<br>16,9<br>(83)             | n=4<br>12,5<br>(32)                | n=7<br>12,5<br>(56)              | n=3<br>10,0<br>(30)              | n=7<br>20,0<br>(35)              | 0,814  | 0,6163  | N/A                                                               | N/A |
|                                               |                         | < 45<br>mmHg                                                                                      | n=31<br>83,8<br>(37)                         | n=69<br>83,1<br>(83)             | n=28<br>87,5<br>(32)               | n=49<br>87,5<br>(56)             | n=27<br>90,0<br>(30)             | n=28<br>80,0<br>(35)             |        |         |                                                                   |     |
| PaO2 and<br>PaCO2<br>n (%)<br>(N)             | <b>On<br/>admission</b> | PaO2 <60<br>mmHg and<br>PaCO2 ≥<br>45 mmHg,<br>(complete<br>respirator<br>y<br>insufficien<br>cy) | n=3<br>8,1<br>(37)                           | n=4<br>4,8<br>(83)               | n=3<br>9,4<br>(32)                 | n=3<br>5,4<br>(56)               | n=5<br>16,7<br>(30)              | n=4<br>11,4<br>(35)              | 0,525  | 0,417   | N/A                                                               | N/A |
|                                               |                         | PaO2 ≥60<br>mmHg and<br>PaCO2 <45<br>mmHg                                                         | n=34<br>91,9<br>(37)                         | n=79<br>95,2<br>(83)             | n=29<br>90,6<br>(32)               | n=53<br>94,6<br>(56)             | n=25<br>83,3<br>(30)             | n=31<br>88,6<br>(35)             |        |         |                                                                   |     |
| n (%)<br>(N)                                  | <b>On<br/>discharge</b> | PaO2 <60<br>mmHg and<br>PaCO2 ≥<br>45 mmHg,<br>(complete<br>respirator<br>y<br>insufficien<br>cy) | n=1<br>2,7<br>(37)                           | n=3<br>3,6<br>(83)               | n=1<br>3,1<br>(32)                 | n=3<br>5,4<br>(56)               | n=2<br>6,7<br>(30)               | n=4<br>11,4<br>(35)              | 0,684  | 0,2473  | N/A                                                               | N/A |
|                                               |                         | PaO2 ≥60<br>mmHg and<br>PaCO2 <45<br>mmHg                                                         | n=36<br>97,3<br>(37)                         | n=80<br>96,4<br>(83)             | n=31<br>96,9<br>(32)               | n=53<br>94,6<br>(56)             | n=28<br>93,3<br>(30)             | n=31<br>88,6<br>(35)             |        |         |                                                                   |     |
| HCO3<br>standard<br>mean±SD<br>min-max<br>(N) | <b>On<br/>admission</b> | mmol/l                                                                                            | 24,0±4,82<br>12,1-32,9<br>(37)               | 25,3±3,15<br>15,6-32,7<br>(82)   | 23,8±4,07<br>14,3-32,7<br>(32)     | 24,7±4,26<br>15,5-39,5<br>(53)   | 22,6±3,72<br>13,5-30,7<br>(30)   | 25,4±4,94<br>17,5-38,6<br>(35)   | 0,301  | 0,6971  | N/A                                                               | N/A |
| mean±SD<br>min-max<br>(N)                     | <b>On<br/>discharge</b> |                                                                                                   | 23,9±4,28<br>12,1-31,2<br>(37)               | 25,4±3,51<br>13,1-35,7<br>(82)   | 24,4±4,14<br>13,7-33,9<br>(32)     | 25,8±6,27<br>14,0-51,7<br>(53)   | 24,2±3,54<br>17,4-30,7<br>(30)   | 25,4±4,36<br>18,5-36,7<br>(35)   | 0,895  | 0,89765 | N/A                                                               | N/A |
| BE<br>mean±SD<br>min-max<br>(N)               | <b>On<br/>admission</b> |                                                                                                   | [-]<br>11,0±5,97<br>[-]15,7-<br>10,5<br>(15) | 2,1±3,64<br>[-]8,4-7,9<br>(25)   | [-]0,1±5,66<br>[-]12,5-9,0<br>(19) | 3,1±4,62<br>[-]4,3-15,7<br>(24)  | 1,0±3,37<br>[-] 3,3-7,0<br>(12)  | 3,2±7,15<br>[-]7,4-14,6<br>(10)  | 0,533  | 0,64847 | N/A                                                               | N/A |

|                                                   |                 |                                                   |                                            |                                     |                                    |                                    |                                    |                                        |       |         |                                                               |                                                                    |
|---------------------------------------------------|-----------------|---------------------------------------------------|--------------------------------------------|-------------------------------------|------------------------------------|------------------------------------|------------------------------------|----------------------------------------|-------|---------|---------------------------------------------------------------|--------------------------------------------------------------------|
| mean±SD<br>min-max<br>(N)                         | On<br>discharge |                                                   | [-<br>]1,4±6,09<br>[-]15,7-<br>6,0<br>(15) | 2,0±4,80<br>[-]11,0-11,9<br>(25)    | 0,8±5,51<br>[-]13,6-10,1<br>(19)   | 3,6±6,23<br>[-]14,7-17,1<br>(24)   | 0,6±4,14<br>[-] 5,3-7,0<br>(12)    | 2,1±5,96<br>[-]7,4-13,2<br>(10)        | 0,509 | 0,5946  | N/A                                                           | N/A                                                                |
| Lactates<br>mean±SD<br>min-max<br>(N)             | On<br>admission |                                                   | 2,8±2,59<br>0,8-12,8<br>(31)               | 2,3±0,89<br>0,6-4,9<br>(73)         | 1,9±0,77<br>0,5-3,7<br>(28)        | 2,07±0,91<br>0,6-5,7<br>(51)       | 2,8±2,31<br>0,6-12,0<br>(27)       | 2,3±1,31<br>0,8-6,0<br>(32)            | 0,047 | 0,3344  | 0,15 <sup>a</sup><br>0,998 <sup>b</sup><br>0,155 <sup>c</sup> | N/A                                                                |
| mean±SD<br>min-max<br>(N)                         | On<br>discharge |                                                   | 2,7±2,58<br>0,9-12,8<br>(31)               | 2,4±0,89<br>0,7-5,1<br>(73)         | 1,9±0,81<br>0,5-4,2<br>(28)        | 2,2±1,13<br>0,6-6,4<br>(51)        | 2,5±1,10<br>0,8-4,5<br>(27)        | 2,4±1,32<br>0,8-6,0<br>(32)            | 0,072 | 0,5348  | N/A                                                           | N/A                                                                |
| Lactate<br>acidosis<br>n (%)<br>(N)               |                 | pH <7.35<br>and<br>lactates<br>>1.6<br>mmol/L     | n=3<br>9,7<br>(31)                         | n=6<br>8,2<br>(73)                  | n=2<br>7,1<br>(28)                 | n=3<br>5,9<br>(51)                 | n=6<br>22,2<br>(27)                | n=2<br>6,25<br>(32)                    | 0,258 | 0,9199  | N/A                                                           | N/A                                                                |
|                                                   |                 | pH >7.35<br>or and<br>lactates <<br>1.6<br>mmol/L | n=28<br>90,3<br>(31)                       | n=67<br>91,8<br>(73)                | n=26<br>92,9<br>(28)               | n=48<br>94,1<br>(51)               | n=21<br>77,8<br>(27)               | n=30<br>93,75<br>(32)                  |       |         |                                                               |                                                                    |
| Osmolarity<br>mean±SD<br>min-max<br>(N)           | On<br>admission | mOsm                                              | 310,3±17,<br>14<br>282-370<br>(29)         | 301,5±16,24<br>247,0-362,0<br>(94)  | 319,6±24,7<br>292-373<br>(11)      | 301,2±25,95<br>233,0-357,0<br>(30) | 311,6±18,13<br>277,5-344,5<br>(14) | 298,8±25,8<br>245,8-343,0<br>(18)      | 0,542 | 0,9174  | N/A                                                           | N/A                                                                |
| mean±SD<br>min-max<br>(N)                         | On<br>discharge |                                                   | 306,6±19,<br>79<br>270-348<br>(29)         | 298,0±15,35<br>272,0-362,0<br>(94)  | 314,2±28,51<br>281,4-373<br>(11)   | 300,5±19,33<br>263,0-356,0<br>(30) | 311,1±20,39<br>287,1-346,6<br>(14) | 299,8±24,4<br>9<br>265,0-353,0<br>(18) | 0,642 | 0,8035  | N/A                                                           | N/A                                                                |
| Electrolytes, inflammatory and iron<br>biomarkers |                 |                                                   |                                            |                                     |                                    |                                    |                                    |                                        |       |         |                                                               |                                                                    |
| Na<br>mean±SD<br>min-max<br>(N)                   | On<br>admission | mmol/l                                            | 137,4±4,6<br>5<br>121-150<br>(200)         | 138,4±4,31<br>106,0-159,0<br>(1064) | 137,9±6,36<br>106-157<br>(141)     | 137,7±7,29<br>101,0-175,0<br>(325) | 137,7±6,37<br>124-174<br>(116)     | 138,0±7,24<br>108,0-163,0<br>(142)     | 0,767 | 0,2376  | N/A                                                           | N/A                                                                |
| mean±SD<br>min-max<br>(N)                         | On<br>discharge |                                                   | 137,4±4,7<br>121-150<br>(200)              | 139,0±4,11<br>109,0-167,0<br>(1064) | 137,9±6,6<br>106-157<br>(141)      | 138,8±7,12<br>101,0-172,0<br>(325) | 137,7±6,37<br>124-172<br>(116)     | 140,3±6,95<br>124,0-170,0<br>(142)     | 0,395 | 0,0689  | N/A                                                           | N/A                                                                |
| K<br>mean±SD<br>min-max<br>(N)                    | On<br>admission | mmol/l                                            | 4,2±0,74<br>2,5-7,5<br>(202)               | 4,0±0,54<br>2,0-6,5<br>(1067)       | 4,3±0,77<br>2,4±6,8<br>(142)       | 4,1±0,66<br>2,4-7,0<br>(326)       | 4,5±0,85<br>2,6-8,7<br>(116)       | 4,1±0,75<br>2,5-7,4<br>(142)           | 0,029 | 0,1221  | 0,72 <sup>a</sup><br>0,022 <sup>b</sup><br>0,155 <sup>c</sup> | N/A                                                                |
| mean±SD<br>min-max<br>(N)                         | On<br>discharge |                                                   | 4,4±0,7<br>2,5-7,4<br>(202)                | 4,2±0,56<br>2,0-6,3<br>(1067)       | 4,4±0,82<br>2,3-6,9<br>(142)       | 4,3±0,73<br>2,4-7,0<br>(326)       | 4,5±0,69<br>2,8-6,6<br>(116)       | 4,4±0,69<br>2,53-6,43<br>(142)         | 0,319 | 0,0007  | N/A                                                           | 0,028 <sup>a</sup><br>0,006 <sup>b</sup><br>0,533 <sup>c</sup>     |
| Mg<br>mean±SD<br>min-max<br>(N)                   | On<br>admission | mg/dl                                             | 2,0±0,38<br>0,85-2,9<br>(163)              | 2,1±0,34<br>0,95-5,24<br>(744)      | 2,0±0,43<br>1,3-3,4<br>(105)       | 2,1±0,45<br>1,26-4,1<br>(232)      | 2,0±0,43<br>1,1-3,4<br>(96)        | 2,1±0,38<br>1,28-4,02<br>(106)         | 0,774 | 0,7404  | N/A                                                           | N/A                                                                |
| mean±SD<br>min-max<br>(N)                         | On<br>discharge |                                                   | 2,0±0,39<br>0,8-3,4<br>(163)               | 2,1±0,31<br>0,9-5,24<br>(744)       | 2,0±0,53<br>1,1-4,2<br>(105)       | 2,1±0,39<br>1,16-4,1<br>(232)      | 1,9±0,35<br>1,3-2,8<br>(96)        | 2,1±0,44<br>1,01-4,02<br>(106)         | 0,621 | 0,7510  | N/A                                                           | N/A                                                                |
| CRP<br>mean±SD<br>min-max<br>(N)                  | On<br>admission | mg/l                                              | 96,2±88,2<br>5<br>0,39-<br>531,6<br>(203)  | 73,4±83,2<br>0,13-496,98<br>(1049)  | 89,5±101,94<br>0,75-487,4<br>(143) | 80,8±79,92<br>0,29-538,55<br>(325) | 76,6±81,61<br>0,4-345<br>(116)     | 78,7±0,4-<br>390,9<br>(142)            | 0,136 | 0,3103  | N/A                                                           | N/A                                                                |
| mean±SD<br>min-max<br>(N)                         | On<br>discharge |                                                   | 68,1±98,3<br>9<br>0,5-494,7<br>(203)       | 44,8±74,68<br>0,13-496,98<br>(1049) | 80,0±97,25<br>0,22-432,9<br>(143)  | 67,9±91,47<br>0,25-538,55<br>(325) | 68,4±75,45<br>0,42-289,5<br>(116)  | 81,1±96,86<br>0,4-431,9<br>(142)       | 0,465 | <0.0001 | N/A                                                           | 0,00012 <sup>a</sup><br><0.0001 <sup>b</sup><br>0,358 <sup>c</sup> |
| Procalcitonin<br>mean±SD<br>min-max<br>(N)        | On<br>admission | ng/ml                                             | 1,5±6,28<br>0,01-<br>61,28<br>(163)        | 0,72±4,03<br>0,01-55,01<br>(736)    | 2,1±9,56<br>0,02-72,61<br>(111)    | 1,73±13,2<br>0,01-196,04<br>(228)  | 1,0±2,64<br>0,01-17,48<br>(97)     | 2,0±8,21<br>0,01-60,77<br>(106)        | 0,399 | 0,1596  | N/A                                                           | N/A                                                                |
| mean±SD<br>min-max<br>(N)                         | On<br>discharge |                                                   | 1,9±8,92<br>0,01-<br>75,16<br>(163)        | 0,70±3,80<br>0,01-44,39<br>(736)    | 2,36±9,01<br>0,01-81,09<br>(111)   | 1,10±3,88<br>0,01-30,67<br>(228)   | 1,1±3,62<br>0,01-27,61<br>(97)     | 1,27±6,13<br>0,02-60,77<br>(106)       | 0,323 | 0,2963  | N/A                                                           | N/A                                                                |
| IL-6 !!!<br>mean±SD<br>min-max<br>(N)             | On<br>admission | pg/ml                                             | 52,3±128,<br>18<br>2-1000<br>(74)          | 64,1±463,3<br>2,0-9099,0<br>(397)   | 43,2±67,97<br>2,33-398<br>(34)     | 42,8±62,71<br>2,0-499,0<br>(108)   | 65,0±94,78<br>2,51-421<br>(36)     | 63,2±98,39<br>2,0-373,0<br>(43)        | 0,541 | 0,3417  | N/A                                                           | N/A                                                                |
| mean±SD<br>min-max<br>(N)                         | On<br>discharge |                                                   | 39,9±120,<br>82<br>2-1000<br>(74)          | 66,4±473,84<br>2,0-9099,0<br>(397)  | 36,9±69,08<br>2-398<br>(34)        | 40,6±76,18<br>2,0-449,0<br>(108)   | 99,2±217,1<br>2,51-1000<br>(36)    | 57,7±83,59<br>2,0-369,0<br>(43)        | 0,268 | 0,3484  | N/A                                                           | N/A                                                                |
| ESR<br>mean±SD<br>min-max<br>(N)                  | On<br>admission | mm/h                                              | 48,6±40,7<br>7<br>5-139<br>(12)            | 37,2±32,41<br>2,0-137,0<br>(52)     | 41,4±31,29<br>2-100<br>(15)        | 23,3±18,58<br>1,0-78,0 (24)        | 50,1±36,44<br>5-128<br>(15)        | 34,8±29,20<br>3,0-102,0<br>(11)        | 0,762 | 0,0733  | N/A                                                           | N/A                                                                |
| mean±SD<br>min-max<br>(N)                         | On<br>discharge |                                                   | 44,5±37,8<br>0<br>5-139<br>(12)            | 33,0±29,33<br>1,0-122,0<br>(52)     | 42,3±33,51<br>2-100<br>(15)        | 24,5±18,64<br>1,0-78,0<br>(24)     | 50±36,13<br>5-126<br>(15)          | 38,1±24,09<br>7,0-75,0<br>(11)         | 0,832 | 0,1690  | N/A                                                           | N/A                                                                |

|                                                |                 |       |                                              |                                           |                                          |                                         |                                           |                                             |        |              |                                                                  |                                                                |
|------------------------------------------------|-----------------|-------|----------------------------------------------|-------------------------------------------|------------------------------------------|-----------------------------------------|-------------------------------------------|---------------------------------------------|--------|--------------|------------------------------------------------------------------|----------------------------------------------------------------|
| D-dimer<br>mean±SD<br>min-max<br>(N)           | On<br>admission | µg/ml | 3,0±6,94<br>0,21-69,6<br>(163)               | 3,9±13,05<br>0,15-132,8<br>(820)          | 7,6±20,65<br>0,2-127,2<br>(105)          | 6,2±15,17<br>0,23-107,7<br>(261)        | 3,9±14,18<br>0,22-128,0<br>(88)           | 6,1±18,32<br>0,24-128,0<br>(109)            | 0,085  | 0,05811      | N/A                                                              | N/A                                                            |
| mean±SD<br>min-max<br>(N)                      | On<br>discharge |       | 2,4±4,43<br>0,21-<br>32,37<br>(163)          | 3,4±11,68<br>0,15-128,0<br>(820)          | 6,7±16,8<br>0,21-106,02<br>(105)         | 5,3±11,78<br>0,22-89,96<br>(261)        | 3,1±5,21<br>0,22-27,91<br>(88)            | 3,9±10,99<br>0,21-107,54<br>(109)           | 0,027  | 0,0844       | N/A                                                              | N/A                                                            |
| INR<br>mean±SD<br>min-max<br>(N)               | On<br>admission |       | 1,2±0,30<br>0,88-3,6<br>(196)                | 1,1±0,51<br>0,82-15,2<br>(1008)           | 1,3±0,53<br>0,87-5,58<br>(133)           | 1,3±0,62<br>0,88-7,8<br>(303)           | 2,0±3,02<br>0,9-21,1<br>(111)             | 1,6±1,91<br>0,89-18,74<br>(131)             | 0,007  | 0,0002       | 0,301 <sup>a</sup><br>0,013 <sup>b</sup><br>0,029 <sup>c</sup>   | 0,005 <sup>a</sup><br>0,012 <sup>b</sup><br>0,087 <sup>c</sup> |
| n (%)<br>(N)                                   |                 | >1.5  | n=9<br>4,6<br>(196)                          | n=32<br>3,2<br>(1008)                     | n=13<br>9,8<br>(133)                     | n=31<br>10,2<br>(303)                   | n=21<br>18,9<br>(111)                     | n=32<br>24,4<br>(131)                       | 0,0003 | <0.0001      | 0,3145 <sup>a</sup><br>0,0003 <sup>b</sup><br>0,185 <sup>c</sup> | <0.0001<br>0,0001<br>0,0006 <sup>c</sup>                       |
|                                                |                 | ≤1.5  | n=187<br>95,4<br>(196)                       | n=976<br>86,8<br>(1008)                   | n=120<br>90,2<br>(133)                   | n=272<br>89,8<br>(303)                  | n=90<br>91,1<br>(111)                     | n=99<br>75,6<br>(131)                       |        |              |                                                                  |                                                                |
| mean±SD<br>min-max<br>(N)                      | On<br>discharge |       | 1,2±0,63<br>0,88-9,18<br>(196)               | 1,1±0,32<br>0,82-6,82<br>(1008)           | 1,3±0,49<br>0,88-6,0<br>(133)            | 1,3±0,85<br>0,88-13,09<br>(303)         | 1,6±2,0<br>0,93-21,1<br>(111)             | 1,3±0,75<br>0,87-7,99<br>(131)              | 0,170  | 0,00010<br>3 | N/A                                                              | 0,011 <sup>a</sup><br>0,003 <sup>b</sup><br>0,609 <sup>c</sup> |
| n (%)<br>(N)                                   |                 | >1.5  | n=15<br>7,7<br>(196)                         | n=33<br>3,3<br>(1008)                     | n=12<br>9,0<br>(133)                     | n=25<br>8,3<br>(303)                    | n=20<br>18,0<br>(111)                     | n=22<br>16,8<br>(131)                       | 0,014  | <0.0001      | 1 <sup>a</sup><br>0,0315 <sup>b</sup><br>0,1793 <sup>c</sup>     | 0,0012 <sup>a</sup><br>0,0001<br>0,0416 <sup>c</sup>           |
|                                                |                 | ≤1.5  | n=181<br>92,3<br>(196)                       | n=975<br>96,7<br>(1008)                   | n=121<br>91,0<br>(133)                   | n=278<br>91,7<br>(303)                  | n=91<br>82,0<br>(111)                     | n=109<br>83,2<br>(131)                      |        |              |                                                                  |                                                                |
| aPTT,<br>n (%)<br>(N)                          | On<br>admission | >60 s | n=5<br>2,6<br>(189)                          | n=22<br>2,2<br>(979)                      | n=1<br>0,8<br>(128)                      | n=6<br>2,0<br>(294)                     | n=9<br>8,3<br>(109)                       | n=2<br>1,6<br>(126)                         | 0,008  | 0,9999       | 1 <sup>a</sup><br>0,1296 <sup>b</sup><br>0,0192 <sup>c</sup>     | N/A                                                            |
|                                                |                 | ≤60 s | n=184<br>97,4<br>(189)                       | n=957<br>97,8<br>(979)                    | n=127<br>99,2<br>(128)                   | n=288<br>98,0<br>(294)                  | n=100<br>91,7<br>(109)                    | n=124<br>98,4<br>(126)                      |        |              |                                                                  |                                                                |
| n (%)<br>(N)                                   | On<br>discharge | >60 s | n=13<br>6,9<br>(189)                         | n=33<br>3,4<br>(979)                      | n=1<br>0,8<br>(128)                      | n=6<br>2,0<br>(294)                     | n=11<br>10,1<br>(109)                     | n=1<br>0,8<br>(126)                         | 0,007  | 0,2189       | 0,062 <sup>a</sup><br>1 <sup>b</sup><br>0,0092 <sup>c</sup>      | N/A                                                            |
|                                                |                 | <60 s | n=176<br>93,1<br>(189)                       | n=946<br>96,6<br>(979)                    | n=127<br>99,2<br>(128)                   | n=288<br>98,0<br>(294)                  | n=98<br>89,9<br>(109)                     | n=125<br>99,2<br>(126)                      |        |              |                                                                  |                                                                |
| Fibrinogen<br>mean±SD<br>min-max<br>(N)        | On<br>admission | g/dl  | 4,8±1,88<br>0,35-8,75<br>(46)                | 4,9±1,82<br>0,44-10,0<br>(228)            | 5,4±1,88<br>1,74-9,04<br>(21)            | 4,6±1,67<br>0,37-9,2<br>(55)            | 4,6±1,73<br>1,78-9,1<br>(29)              | 4,4±1,62<br>2,1-8,11<br>(24)                | 0,364  | 0,3363       | N/A                                                              | N/A                                                            |
| mean±SD<br>min-max<br>(N)                      | On<br>discharge |       | 5,1±2,27<br>1,76-10,0<br>(46)                | 4,7±1,92<br>0,44-10,0<br>(228)            | 5,6±2,23<br>1,52-10,0<br>(21)            | 4,7±2,01<br>0,37-9,2<br>(55)            | 4,9±1,83<br>1,53-8,71<br>(29)             | 4,9±2,13<br>2,1-9,04<br>(24)                | 0,477  | 0,8916       | N/A                                                              | N/A                                                            |
| Ferritin<br>mean±SD<br>min-max<br>(N)          | On<br>admission | ng/ml | 1047,7±1<br>064,24<br>55,3-5430<br>(113)     | 952,7±1863,<br>83<br>9,4-37400,0<br>(502) | 745,1±917,1<br>4<br>9,0-6226<br>(66)     | 833,9±992,6<br>4<br>8,0-7316,0<br>(149) | 672,8±909,6<br>7<br>15,7-5910<br>(57)     | 894,8±823,<br>99<br>19,0-3560,0<br>(67)     | 0,035  | 0,5949       | 0,114 <sup>a</sup><br>0,047 <sup>b</sup><br>0,9 <sup>c</sup>     | N/A                                                            |
| mean±SD<br>min-max<br>(N)                      | On<br>discharge |       | 961,6±97<br>6,85<br>55,3-5430<br>(113)       | 912,5±1980,<br>9<br>9,4-3740,0<br>(502)   | 777,2±962,5<br>6<br>9,0-6226<br>(66)     | 822,8±1067,<br>7<br>8,0-7970,0<br>(149) | 3408,6±1528<br>6,5<br>22,4-103000<br>(57) | 974,0±921,<br>85<br>17,0-4602,0<br>(67)     |        |              |                                                                  |                                                                |
| TSAT<br>(Fe/TIBC)<br>mean±SD<br>min-max<br>(N) | On<br>admission | %     | 22,4±12,2<br>3<br>6,09-<br>45,18<br>(18)     | 26,4±26,10<br>2,38-200,0<br>(68)          | 19,2±13,72<br>3,51-58,52<br>(25)         | 22,0±17,65<br>0-68,29<br>(25)           | 17,0±13,09<br>0-44,17<br>(17)             | 28,8±15,23<br>6,88-61,74<br>(17)            | 0,462  | 0,4142       | N/A                                                              | N/A                                                            |
| mean±SD<br>min-max<br>(N)                      | On<br>discharge |       | 24,3±12,3<br>7<br>4,0-45,18<br>(18)          | 24,8±16,93<br>3,1-86,94<br>(68)           | 20,5±14,30<br>3,51-59,26<br>(25)         | 23,0±18,03<br>0-68,29 (25)              | 17,2±14,08<br>0-48,33<br>(17)             | 24,6±12,98<br>6,89-50,22<br>(17)            | 0,301  | 0,9133       | N/A                                                              | N/A                                                            |
| Fe<br>mean±SD<br>min-max<br>(N)                | On<br>admission |       | 56,2±33,5<br>2<br>14,0-<br>151,9<br>(31)     | 55,9±41,87<br>10,0-178,0<br>(94)          | 45,3±43,94<br>10,0-197,0<br>(35)         | 47,7±34,31<br>10,0-155,25<br>(42)       | 37,6±23,54<br>10,0-101,0<br>(25)          | 58,7±54,13<br>16,2-314,0<br>(32)            | 0,061  | 0,4197       | N/A                                                              | N/A                                                            |
| mean±SD<br>min-max<br>(N)                      | On<br>discharge |       | 59,8±35,7<br>7<br>10,0-<br>151,9<br>(31)     | 58,6±51,33<br>10,0-366,6<br>(94)          | 41,3±36,14<br>10,0-197,0<br>(35)         | 52,0±39,16<br>10,0-169,8<br>(42)        | 39,0±27,46<br>5,0-107,78<br>(25)          | 56,7±55,11<br>11,2-320,0<br>(32)            | 0,041  | 0,7159       | 0,099 <sup>a</sup><br>0,044 <sup>b</sup><br>0,959 <sup>c</sup>   | N/A                                                            |
| sTfR<br>mean±SD<br>min-max<br>(N)              | On<br>admission | mg/l  | 1,2±0,37<br>0,8-1,81<br>(9)                  | 2,1±1,46<br>0,4-5,21<br>(8)               | 1,9±0,83<br>1,02-2,94<br>(6)             | 1,3±0,41<br>0,79-2,3<br>(14)            | 2,1±1,03<br>1,02-4,01<br>(6)              | 1,4±0,65<br>0,94-2,71<br>(6)                | 0,093  | 0,3524       | N/A                                                              | N/A                                                            |
| mean±SD<br>min-max<br>(N)                      | On<br>discharge |       | 1,2±0,37<br>0,8-1,81<br>(9)                  | 2,1±1,46<br>0,4-5,21<br>(8)               | 1,8±0,73<br>1,18-2,94<br>(6)             | 1,3±0,41<br>0,79-2,3<br>(14)            | 2,1±1,03<br>1,02-4,01<br>(6)              | 1,4±0,65<br>0,94-2,71<br>(6)                | 0,089  | 0,3548       | N/A                                                              | N/A                                                            |
| Vitamin B12<br>mean±SD<br>min-max<br>(N)       | On<br>admission | pg/ml | 507,5±32<br>2,13<br>131,0-<br>1171,0<br>(34) | 849,7±1266,<br>1<br>150,0-6000,0<br>(89)  | 459,0±307,1<br>3<br>115,0-1500,0<br>(29) | 624,5±919,3<br>109,0-5907,0<br>(52)     | 556,5±501,8<br>6<br>109,0-2659,0<br>(37)  | 613,7±773,<br>5<br>155,0-<br>4344,0<br>(29) | 0,612  | 0,3831       | N/A                                                              | N/A                                                            |
| mean±SD<br>min-max<br>(N)                      | On<br>discharge |       | 495,2±31<br>1,33                             | 793,2±1061,<br>9<br>147,0-6000,0          | 520,1±308,4<br>1<br>128,0-1500,0         | 703,2±928,8<br>109,0-5907,0<br>(52)     | 611,2±481,8<br>5<br>109,0-2659,0          | 624,3±768,<br>91                            | 0,478  | 0,6449       | N/A                                                              | N/A                                                            |

|                                                                |                 |                                     |                                     |                                     |                                  |                                    |                                  |                                   |         |         |                                                                    |                                                                     |
|----------------------------------------------------------------|-----------------|-------------------------------------|-------------------------------------|-------------------------------------|----------------------------------|------------------------------------|----------------------------------|-----------------------------------|---------|---------|--------------------------------------------------------------------|---------------------------------------------------------------------|
|                                                                |                 |                                     | 131,0-1171,0<br>(34)                | (89)                                | (29)                             |                                    | (37)                             | 155,0-4344,0<br>(29)              |         |         |                                                                    |                                                                     |
| Folic acid<br>mean±SD<br>min-max<br>(N)                        | On<br>admission | ng/ml                               | 7,3±5,46<br>2,18-24,0<br>(29)       | 7,3±4,41<br>1,5-20,0<br>(92)        | 8,6±5,11<br>1,8-20,0<br>(30)     | 7,1±5,43<br>2,6-24,0<br>(49)       | 7,5±5,29<br>1,6-24,0<br>(38)     | 8,1±7,04<br>1,0-24,0<br>(31)      | 0,590   | 0,8009  | N/A                                                                | N/A                                                                 |
| mean±SD<br>min-max<br>(N)                                      | On<br>discharge |                                     | 6,7±4,68<br>2,18-24,0<br>(29)       | 7,6±4,59<br>1,6-24,0<br>(92)        | 9,3±5,21<br>2,5-20,0<br>(30)     | 7,8±5,95<br>1,4-24,0<br>(49)       | 8,7±6,18<br>1,6-24,0<br>(38)     | 9,2±7,44<br>1,0-24,0<br>(31)      | 0,102   | 0,5253  | N/A                                                                | N/A                                                                 |
| Biochemistry                                                   |                 |                                     |                                     |                                     |                                  |                                    |                                  |                                   |         |         |                                                                    |                                                                     |
| Glucose<br>mean±SD<br>min-max<br>(N)                           | On<br>admission | mg/dl                               | 207,2±12<br>0,86<br>28-733<br>(186) | 119,1±48,6<br>50,0-933,0<br>(864)   | 208,9±136,2<br>47-1026<br>(132)  | 126,0±45,14<br>61,0-396,0<br>(309) | 189,3±134,8<br>37-1064<br>(108)  | 119,7±34,1<br>49,0-292,0<br>(129) | 0,455   | 0,0725  | N/A                                                                | N/A                                                                 |
| mean±SD<br>min-max<br>(N)                                      | On<br>discharge |                                     | 173,3±92,<br>95<br>44-637<br>(186)  | 113,3±60,22<br>37,0-1444,0<br>(864) | 187,1±113,2<br>47-596<br>(132)   | 123,0±55,15<br>59,0-484,0<br>(309) | 174,8±97,68<br>14-685<br>(108)   | 120,4±45,3<br>49,0-341,0<br>(129) | 0,495   | 0,0225  | N/A                                                                | 0,026 <sup>a</sup><br>0,249 <sup>b</sup><br>0,871 <sup>c</sup>      |
| Glycated<br>hemoglobin<br>(HbA1c)<br>mean±SD<br>min-max<br>(N) | On<br>admission | %                                   | 8,6±2,26<br>5,7-14,9<br>(65)        | 6,2±1,37<br>4,2-11,2<br>(58)        | 8,3±2,37<br>5,6-16,6<br>(47)     | 6,3±0,92<br>4,8-8,5<br>(27)        | 7,5±1,62<br>5,1-11,9<br>(42)     | 6,8±2,24<br>5,1-13,7<br>(15)      | 0,002   | 0,6869  | 0,438 <sup>a</sup><br>0,002 <sup>b</sup><br>0,163 <sup>c</sup>     | N/A                                                                 |
| mean±SD<br>min-max<br>(N)                                      | On<br>discharge |                                     | 8,7±2,20<br>5,7-14,9<br>(65)        | 6,2±1,37<br>4,2-11,2<br>(58)        | 8,2±2,40<br>5,6-16,8<br>(47)     | 6,3±0,95<br>4,7-8,7<br>(27)        | 7,6±1,63<br>5,1-11,9<br>(42)     | 6,8±2,25<br>5,1-13,7<br>(15)      | 0,011   | 0,6709  | 0,544 <sup>a</sup><br>0,007 <sup>b</sup><br>0,266 <sup>c</sup>     | N/A                                                                 |
| Urea<br>mean±SD<br>min-max<br>(N)                              | On<br>admission | mg/dl                               | 60,0±43,9<br>1<br>11-301<br>(191)   | 39,6±33,38<br>5,0-307,0<br>(936)    | 74,6±56,42<br>12-353<br>(137)    | 60,0±45,94<br>8,0-298,0<br>(309)   | 80,2±51,15<br>19-336<br>(109)    | 73,2±50,73<br>12,0-289<br>(139)   | 0,0009  | <0.0001 | 0,032 <sup>a</sup><br>0,002 <sup>b</sup><br>0,961 <sup>c</sup>     | <0.0001 <sup>a</sup><br><0.0001 <sup>b</sup><br>0,025 <sup>c</sup>  |
| mean±SD<br>min-max<br>(N)                                      | On<br>discharge |                                     | 51,9±38,1<br>9<br>9-240<br>(191)    | 39,0±30,24<br>5,0-307,0<br>(936)    | 79,4±69,02<br>12-396<br>(137)    | 60,6±45,74<br>10,0-244,0<br>(309)  | 83,1±56,85<br>21-342<br>(109)    | 73,6±47,87<br>15,0-296,0<br>(139) | <0.0001 | <0.0001 | 0,00011 <sup>a</sup><br><0.0001 <sup>b</sup><br>0,889 <sup>c</sup> | <0.0001 <sup>a</sup><br><0.0001 <sup>b</sup><br>0,019 <sup>c</sup>  |
| Creatinine<br>mean±SD<br>min-max<br>(N)                        | On<br>admission |                                     | 1,5±1,53<br>0,39-<br>14,77<br>(201) | 1,1±1,1<br>0,26-14,87<br>(995)      | 1,7±1,36<br>0,61-9,56<br>(143)   | 1,4±1,26<br>0,56-12,66<br>(326)    | 2,0±1,50<br>0,49-9,27<br>(116)   | 1,6±1,59<br>0,44-11,3<br>(142)    | 0,014   | <0.0001 | 0,445 <sup>a</sup><br>0,01 <sup>b</sup><br>0,16 <sup>c</sup>       | 0,003 <sup>a</sup><br>0,0003 <sup>b</sup><br>0,119 <sup>c</sup>     |
| n (%)<br>(N)                                                   |                 | <1.2<br>mg/dl                       | n=125<br>62,2<br>(201)              | n=831<br>83,5<br>(995)              | n=71<br>49,7<br>(143)            | n=217<br>66,6<br>(326)             | n=46<br>39,7<br>(116)            | n=75<br>52,8<br>(142)             | 0,003   | <0.0001 | 0,5261 <sup>a</sup><br>0,0007 <sup>b</sup><br>0,4284 <sup>c</sup>  | <0.0001 <sup>a</sup><br><0.0001 <sup>b</sup><br>0,0872 <sup>c</sup> |
|                                                                |                 | 1.2-1.9<br>mg/dl                    | n=49<br>24,4<br>(201)               | n=107<br>10,8<br>(995)              | n=44<br>30,8<br>(143)            | n=69<br>21,2<br>(326)              | n=32<br>27,6<br>(116)            | n=37<br>26,1<br>(142)             |         |         |                                                                    |                                                                     |
|                                                                |                 | 2.0-3.5<br>mg/dl                    | n=14<br>7,0<br>(201)                | n=30<br>10,5<br>(995)               | n=15<br>10,5<br>(143)            | n=23<br>7,1<br>(326)               | n=23<br>19,8<br>(116)            | n=24<br>14,8<br>(142)             |         |         |                                                                    |                                                                     |
|                                                                |                 | 3.5-4.9<br>mg/dl                    | n=8<br>4,0<br>(201)                 | n=9<br>0,9<br>(995)                 | n=6<br>4,2<br>(143)              | n=8<br>2,5<br>(326)                | n=9<br>7,8<br>(116)              | n=4<br>2,8<br>(142)               |         |         |                                                                    |                                                                     |
|                                                                |                 | ≥5 mg/dl                            | n=5<br>2,5<br>(201)                 | n=18<br>1,8<br>(995)                | n=7<br>4,9<br>(143)              | n=9<br>2,8<br>(326)                | n=6<br>5,2<br>(116)              | n=5<br>3,5<br>(142)               |         |         |                                                                    |                                                                     |
| mean±SD<br>min-max<br>(N)                                      | On<br>discharge |                                     | 1,3±1,51<br>0,4-14,82<br>(201)      | 1,0±0,94<br>0,26-14,87<br>(995)     | 1,6±1,40<br>0,57-7,72<br>(143)   | 1,3±1,32<br>0,36-12,35<br>(326)    | 1,8±1,58<br>0,43-9,27<br>(116)   | 1,5±1,31<br>0,43-8,2<br>(142)     | 0,019   | <0.0001 | 0,138 <sup>a</sup><br>0,021 <sup>b</sup><br>0,585 <sup>c</sup>     | 0,0004 <sup>a</sup><br><0.0001 <sup>b</sup><br>0,286 <sup>c</sup>   |
| n (%)<br>(N)                                                   |                 | <1.2 mg/dl                          | n=147<br>73,1<br>(201)              | n=858<br>86,2<br>(995)              | n=85<br>59,4<br>(143)            | n=227<br>69,6<br>(326)             | n=51<br>44,0<br>(116)            | n=79<br>55,6<br>(142)             | <0.0001 | <0.0001 | 0,104 <sup>a</sup><br><0.0001 <sup>b</sup><br>0,1 <sup>c</sup>     | <0.0001 <sup>a</sup><br><0.0001 <sup>b</sup><br>0,0663 <sup>c</sup> |
|                                                                |                 | 1.2-1.9<br>mg/dl                    | n=30<br>14,9<br>(201)               | n=84<br>8,5<br>(995)                | n=26<br>18,2<br>(143)            | n=59<br>18,1<br>(326)              | n=38<br>32,8<br>(116)            | n=36<br>25,4<br>(142)             |         |         |                                                                    |                                                                     |
|                                                                |                 | 2.0-3.4<br>mg/dl                    | n=14<br>7,0<br>(201)                | n=28<br>2,8<br>(995)                | n=15<br>10,5<br>(143)            | n=22<br>6,7<br>(326)               | n=12<br>10,3<br>(116)            | n=19<br>13,4<br>(142)             |         |         |                                                                    |                                                                     |
|                                                                |                 | 3.5-4.9<br>mg/dl                    | n=5<br>2,5<br>(201)                 | n=11<br>1,1<br>(995)                | n=12<br>8,4<br>(143)             | n=10<br>3,1<br>(326)               | n=9<br>7,8<br>(116)              | n=3<br>2,1<br>(142)               |         |         |                                                                    |                                                                     |
|                                                                |                 | ≥5 mg/dl                            | n=5<br>2,5<br>(201)                 | n=14<br>1,4<br>(995)                | n=5<br>3,5<br>(143)              | n=8<br>2,5<br>(326)                | n=6<br>5,2<br>(116)              | n=5<br>3,5<br>(142)               |         |         |                                                                    |                                                                     |
| eGFR<br>mean±SD<br>min-max<br>(N)                              | On<br>admission | ml/min/1,<br>73 m²                  | 70,2±34,7<br>3,0-239,0<br>(201)     | 87,7±33,63<br>0-433,0<br>(990)      | 55,1±27,37<br>4,0-131,0<br>(143) | 65,2±28,64<br>4,0-149,0<br>(326)   | 47,0±38,34<br>6,0-180,0<br>(116) | 57,4±30,44<br>5,0-145,0<br>(142)  | <0.0001 | <0.0001 | <0.0001 <sup>a</sup><br><0.0001 <sup>b</sup><br>0,667 <sup>c</sup> | <0.0001 <sup>a</sup><br><0.0001 <sup>b</sup><br>0,029 <sup>c</sup>  |
| n (%)<br>(N)                                                   |                 | <60<br>ml/min/1,<br>73 m², n<br>(%) | n=82<br>40,8<br>(201)               | n=153<br>15,5<br>(990)              | n=77<br>53,8<br>(143)            | n=131<br>40,2<br>(326)             | n=80<br>69,0<br>(116)            | n=80<br>56,3<br>(142)             | <0.0001 | <0.0001 | 0,067 <sup>a</sup><br><0.0001 <sup>b</sup><br>0,057 <sup>c</sup>   | <0.0001 <sup>a</sup><br><0.0001 <sup>b</sup><br>0,0053 <sup>c</sup> |
|                                                                |                 | ≥60<br>ml/min/1,<br>73 m², n<br>(%) | n=119<br>59,2<br>(201)              | n=837<br>84,5<br>(990)              | n=66<br>46,2<br>(143)            | n=195<br>59,8<br>(326)             | n=36<br>31,0<br>(116)            | n=62<br>43,7<br>(142)             |         |         |                                                                    |                                                                     |



|                                            |                 |                                     |                                               |                                           |                                         |                                          |                                         |                                                |         |         |                                                                    |                                                                     |
|--------------------------------------------|-----------------|-------------------------------------|-----------------------------------------------|-------------------------------------------|-----------------------------------------|------------------------------------------|-----------------------------------------|------------------------------------------------|---------|---------|--------------------------------------------------------------------|---------------------------------------------------------------------|
| mean±SD<br>min-max<br>(N)                  | On<br>discharge |                                     | 78,2±35,1<br>5<br>3,0-232,0<br>(201)          | 91,1±34,20<br>0-433,0<br>(990)            | 59,4±30,06<br>7,0-151,0<br>(143)        | 68,2±30,78<br>4,0-208,0<br>(326)         | 55,9±35,58<br>5,0-209,0<br>(116)        | 60,8±31,36<br>5,0-148,0<br>(142)               | <0.0001 | <0.0001 | <0.0001 <sup>a</sup><br><0.0001 <sup>b</sup><br>0,667 <sup>c</sup> | <0.0001 <sup>a</sup><br><0.0001 <sup>b</sup><br>0,05 <sup>c</sup>   |
| n (%)<br>(N)                               |                 | <60<br>ml/min/1,<br>73 m2, n<br>(%) | n=56<br>27,9<br>(201)                         | n=133<br>13,4<br>(990)                    | n=66<br>46,2<br>(143)                   | n=116<br>35,6<br>(326)                   | n=69<br>59,5<br>(116)                   | n=70<br>49,3<br>(142)                          | <0.0001 | <0.0001 | 0,002 <sup>a</sup><br><0.0001 <sup>b</sup><br>0,133 <sup>c</sup>   | <0.0001 <sup>a</sup><br><0.0001 <sup>b</sup><br>0,0218 <sup>c</sup> |
|                                            |                 | ≥60<br>ml/min/1,<br>73 m2, n<br>(%) | n=145<br>72,1<br>(201)                        | n=857<br>86,6<br>(990)                    | n=77<br>53,8<br>(143)                   | n=210<br>64,4<br>(326)                   | n=47<br>40,5<br>(116)                   | n=72<br>50,7<br>(142)                          |         |         |                                                                    |                                                                     |
| Total protein<br>mean±SD<br>min-max<br>(N) | On<br>admission | g/l                                 | 6,0±0,92<br>4,0-8,1<br>(60)                   | 6,1±0,82<br>3,5-8,2<br>(260)              | 6,1±0,87<br>4,6-8,7<br>(45)             | 5,9±0,95<br>3,6-9,5<br>(104)             | 5,7±0,79<br>3,6-7,8<br>(58)             | 5,7±0,96<br>3,3-8,2<br>(61)                    | 0,056   | 0,0198  | N/A                                                                | N/A                                                                 |
| mean±SD<br>min-max<br>(N)                  | On<br>discharge |                                     | 6,0±0,92<br>4,0-8,1<br>(60)                   | 6,0±0,87<br>3,0-8,2 (260)                 | 5,9±0,86<br>4,5-8,7<br>(45)             | 5,8±0,95<br>3,7-9,1<br>(104)             | 5,6±0,88<br>3,4-7,8<br>(58)             | 5,5±0,93<br>3,3-8,1<br>(61)                    | 0,108   | 0,0004  | N/A                                                                | N/A                                                                 |
| Albumin<br>mean±SD<br>min-max<br>(N)       | On<br>admission | g/l                                 | 3,1±0,58<br>1,6-4,4<br>(73)                   | 3,2±0,61<br>1,5-5,1<br>(291)              | 3,1±0,53<br>2,1-4,4<br>(52)             | 3,1±0,57<br>1,1-4,3<br>(105)             | 3,0±0,58<br>0,7-4,0<br>(68)             | 2,9±0,62<br>1,5-4,9<br>(58)                    | 0,236   | 0,021   | N/A                                                                | N/A                                                                 |
| mean±SD<br>min-max<br>(N)                  | On<br>discharge |                                     | 2,9±0,66<br>1,6-4,3<br>(73)                   | 3,1±0,67<br>0,4-5,1<br>(291)              | 3,0±0,59<br>1,7-4,4<br>(52)             | 3,0±0,54<br>1,9-4,3<br>(105)             | 2,8±0,57<br>1,4-4,5<br>(68)             | 2,7±0,63<br>0,9-4,2<br>(58)                    | 0,494   | 0,0009  | N/A                                                                | 0,668 <sup>a</sup><br>0,0007 <sup>b</sup><br>0,009 <sup>c</sup>     |
| Uric acid<br>mean±SD<br>min-max<br>(N)     | On<br>admission | mg/dl                               | 6,2±2,93<br>1,9-17,3<br>(66)                  | 5,3±2,4<br>1,4-23,6<br>(274)              | 6,6±2,69<br>2,7-14,1<br>(49)            | 6,4±3,11<br>1,7-18,4<br>(109)            | 6,8±2,57<br>1,7-13,6<br>(59)            | 6,2±2,25<br>1,9-12,6<br>(51)                   | 0,443   | 0,0005  | N/A                                                                | 0,002 <sup>a</sup><br>0,022 <sup>b</sup><br>0,886 <sup>c</sup>      |
| mean±SD<br>min-max<br>(N)                  | On<br>discharge |                                     | 5,4±2,62<br>1,1-16,5<br>(66)                  | 5,2±2,22<br>1,6-20,4<br>(274)             | 5,8±2,51<br>2,0-12,5<br>(49)            | 6,4±3,22<br>1,9-18,6<br>(109)            | 6,6±2,56<br>1,7-13,2<br>(59)            | 5,8±1,88<br>1,9-10,4<br>(51)                   | 0,039   | 0,0013  | 0,689 <sup>a</sup><br>0,031 <sup>b</sup><br>0,242 <sup>c</sup>     | 0,002 <sup>a</sup><br>0,152 <sup>b</sup><br>0,264 <sup>c</sup>      |
| AST<br>mean±SD<br>min-max<br>(N)           | On<br>admission | IU/L                                | 54,6±71,0<br>7<br>5-630<br>(162)              | 62,0±123,0<br>6,0-2405,0<br>(703)         | 50,5±46,8<br>10-260<br>(107)            | 73,6±312,72<br>7,0-4776,0<br>(234)       | 11,9±409,3<br>10-3866<br>(260)          | 66,4±237,4<br>5<br>8,0-2518,0<br>(110)         | 0,311   | 0,8456  | N/A                                                                | N/A                                                                 |
| mean±SD<br>min-max<br>(N)                  | On<br>discharge |                                     | 43,6±57,1<br>4<br>5-446<br>(162)              | 105,2±943,6<br>8,0-23896,0<br>(703)       | 112,2±634,5<br>8-6591<br>(107)          | 52,8±93,48<br>11,0-1224,0<br>(234)       | 150,4±574,0<br>7-4019<br>(260)          | 101,6±579,<br>98<br>8,0-6088,0<br>(110)        | 0,109   | 0,24498 | N/A                                                                | N/A                                                                 |
| ALT<br>mean±SD<br>min-max<br>(N)           | On<br>admission | IU/L                                | 48,1±66,1<br>5<br>4-604<br>(171)              | 56,7±98,47<br>4,0-1411,0<br>(782)         | 36,6±28,76<br>6-187<br>(122)            | 55,2±231,13<br>4,0-3700,0<br>(262)       | 60,5±168,2<br>5-1361<br>(103)           | 44,8±121,5<br>8<br>6,0-1315,0<br>(117)         | 0,049   | 0,5983  | 0,091 <sup>a</sup><br>0,755 <sup>b</sup><br>0,318 <sup>c</sup>     | N/A                                                                 |
| mean±SD<br>min-max<br>(N)                  | On<br>discharge |                                     | 49,5±70,1<br>0<br>4-604<br>(171)              | 75,8±213,24<br>4,0-5163,0<br>(782)        | 55,9±120,40<br>5-1247<br>(122)          | 47,4±73,84<br>5,0-938,0<br>(262)         | 85,3±255,10<br>5-1570<br>(103)          | 63,1±274,3<br>2<br>8,0-2985,0<br>(117)         | 0,353   | 0,0063  | N/A                                                                | 0,004 <sup>a</sup><br>0,882 <sup>b</sup><br>0,814 <sup>c</sup>      |
| Bilirubin<br>mean±SD<br>min-max<br>(N)     | On<br>admission |                                     | 0,9±1,43<br>0,1-15,1<br>(151)                 | 0,8±1,46<br>0,1-19,1<br>(684)             | 0,8±0,47<br>0,2-2,8<br>(106)            | 0,9±0,82<br>0,2-9,2<br>(239)             | 0,8±0,81<br>0,1-6,6<br>(88)             | 0,9±0,63<br>0,3-4,2<br>(109)                   | 0,510   | 0,6969  | N/A                                                                | N/A                                                                 |
| mean±SD<br>min-max<br>(N)                  | On<br>discharge |                                     | 1,0±2,40<br>0,2-25,9<br>(151)                 | 0,8±1,66<br>0,1-19,0<br>(684)             | 0,8±0,49<br>0,2-2,8<br>(106)            | 0,9±2,31<br>0,2-35,3<br>(239)            | 1,0±1,39<br>0,2-12,8<br>(88)            | 0,9±0,76<br>0,3-6,1<br>(109)                   | 0,234   | 0,8534  | N/A                                                                | N/A                                                                 |
| GGTP<br>mean±SD<br>min-max<br>(N)          | On<br>admission | U/L                                 | 98,7±159,<br>88<br>10,0-<br>1255,0<br>(144)   | 90,2±163,22<br>6,0-2532,0<br>(669)        | 84,1±110,5<br>10,0-696,0<br>(96)        | 71,3±104,85<br>8,0-975,0<br>(231)        | 70,2±102,9<br>9,0-625,0<br>(83)         | 76,3±114,4<br>9,0-687,0<br>(104)               | 0,265   | 0,1189  | N/A                                                                | N/A                                                                 |
| mean±SD<br>min-max<br>(N)                  | On<br>discharge |                                     | 92,1±129,<br>04<br>11,0-91,0<br>(144)         | 96,0±138,44<br>6,0-1771,0<br>(669)        | 100,2±140,1<br>10,0-733,0<br>(96)       | 75,2±112,0<br>7,0-1091,0<br>(231)        | 62,8±59,61<br>6,0-296,0<br>(83)         | 87,3±146,9<br>5<br>7,0-1207,0<br>(104)         | 0,012   | 0,0765  | 0,892 <sup>a</sup><br>0,054 <sup>b</sup><br>0,048 <sup>c</sup>     | N/A                                                                 |
| LDH<br>mean±SD<br>min-max<br>(N)           | On<br>admission | U/L                                 | 433,5±23<br>7,88<br>124,0-<br>1521,0<br>(136) | 430,4±404,7<br>50,0-7100,0<br>(625)       | 381,7±197,7<br>134,0-1172,0<br>(88)     | 391,9±201,0<br>9<br>44,0-1357,0<br>(195) | 391,6±248,4<br>71,0-1863,0<br>(78)      | 489,8±986,<br>38<br>106,0-<br>9505,0<br>(89)   | 0,187   | 0,1572  | N/A                                                                | N/A                                                                 |
| mean±SD<br>min-max<br>(N)                  | On<br>discharge |                                     | 369,9±24<br>3,39<br>93,0-<br>2133,0<br>(136)  | 395,2±620,6<br>6<br>50,0-11227,0<br>(625) | 392,4±217,3<br>118,0-1189,0<br>(88)     | 357,2±201,1<br>2<br>44,0-1584,0<br>(195) | 438,0±584,7<br>113,0-5037,0<br>(78)     | 470,2±983,<br>39<br>97,0-9505,0<br>(89)        | 0,539   | 0,2591  | N/A                                                                | N/A                                                                 |
| Cardiac biomarkers                         |                 |                                     |                                               |                                           |                                         |                                          |                                         |                                                |         |         |                                                                    |                                                                     |
| BNP<br>mean±SD<br>min-max<br>(N)           | On<br>admission | pg/ml                               | 188,1±22<br>1,49<br>20,0-<br>880,7<br>(37)    | 232,7±723,7<br>2<br>1,7-6924,2<br>(122)   | 758,3±1070,<br>0<br>3,0-4890,6<br>(35)  | 275,7±568,9<br>3<br>10,3-3153,2<br>(64)  | 945,2±1242,<br>0<br>12,4-4993,0<br>(47) | 1090,3±257<br>6,53<br>5,9-13368,4<br>(51)      | <0.0001 | 0,0699  | 0,01 <sup>a</sup><br>0,0005 <sup>b</sup><br>0,747 <sup>c</sup>     | N/A                                                                 |
| mean±SD<br>min-max<br>(N)                  | On<br>discharge |                                     | 170,0±21<br>0,86<br>20,0-<br>787,1<br>(37)    | 236,5±724,4<br>7<br>1,7-6924,2<br>(122)   | 870,3±1868,<br>0<br>3,0-10622,8<br>(35) | 250,7±512,0<br>8<br>10,3-3153,2<br>(64)  | 810,6±999,0<br>11,9-3796,0<br>(47)      | 1047,4±247<br>8,98<br>16,6-<br>13368,4<br>(51) | <0.0001 | 0,0769  | 0,084 <sup>a</sup><br>0,0002 <sup>b</sup><br>0,984 <sup>c</sup>    | N/A                                                                 |



|                                                          |                 |                                                 |                                             |                                             |                                          |                                             |                                          |                                                  |         |         |                                                                  |                                                                     |
|----------------------------------------------------------|-----------------|-------------------------------------------------|---------------------------------------------|---------------------------------------------|------------------------------------------|---------------------------------------------|------------------------------------------|--------------------------------------------------|---------|---------|------------------------------------------------------------------|---------------------------------------------------------------------|
| NT-proBNP<br>mean±SD<br>min-max<br>(N)                   | On<br>admission | ng/ml                                           | 4424±131<br>71<br>29,7-<br>70000<br>(29)    | 1406,3±<br>6196,8<br>12,0-70000,0<br>(138)  | 10758,9±163<br>02<br>315,3-70000<br>(30) | 76939,7±140<br>78,6<br>18,2-70000,0<br>(77) | 15869±1985<br>0<br>119,6-70000<br>(50)   | 12975,7±19<br>271,1<br>279,9-<br>70000,0<br>(42) | 0,012   | <0.0001 | 0,236 <sup>a</sup><br>0,008 <sup>b</sup><br>0,429 <sup>c</sup>   | 0,001 <sup>a</sup><br>0,001 <sup>b</sup><br>0,262 <sup>c</sup>      |
| mean±SD<br>min-max<br>(N)                                | On<br>discharge |                                                 | 2802±658<br>2,1<br>29,7-<br>31739,0<br>(29) | 1649,0±6991<br>,06<br>12,0-70000,0<br>(138) | 12625,5±182<br>84<br>315,3-70000<br>(30) | 8025,9±1468<br>3,7<br>18,2-70000,0<br>(77)  | 14859±1830<br>4<br>119,6-70000<br>(50)   | 12104,5±17<br>602,5<br>360,8-<br>70000,0<br>(42) | <0.0001 | <0.0001 | 0,027 <sup>a</sup><br>0,0002 <sup>b</sup><br>0,858 <sup>c</sup>  | 0,002 <sup>a</sup><br>0,001 <sup>b</sup><br>0,412 <sup>c</sup>      |
| Troponin I,<br>mean±SD<br>min-max<br>(N)                 | On<br>admission |                                                 | 256,6±10<br>35,3<br>1,3-<br>7376,0<br>(126) | 110,4±751,6<br>0-11758,0<br>(542)           | 2830,9±1528<br>7<br>2,4-109360,0<br>(89) | 1245,6±9904<br>,81<br>1,0-125593,0<br>(209) | 1152,0±3112<br>,0<br>3,3-18309,0<br>(87) | 427,1±2200<br>,64<br>4,0-21022,9<br>(95)         | 0,013   | 0,1022  | 0,257 <sup>a</sup><br>0,03 <sup>b</sup><br>0,569 <sup>c</sup>    | N/A                                                                 |
| mean±SD<br>min-max<br>(N)                                | On<br>discharge |                                                 | 192,0±94<br>0,39<br>1,9-<br>7396,0<br>(126) | 101,2±806,3<br>5<br>0,2-12392,0<br>(542)    | 3105,5±1537<br>6<br>2,6-109360<br>(89)   | 1360,1±1253<br>3,8<br>0,8-17463,0<br>(209)  | 1107,0±4014<br>,0<br>3,9-29828,0         | 261,1±722,<br>41<br>1,8-5477,3<br>(95)           | 0,027   | 0,05673 | 0,18 <sup>a</sup><br>0,098 <sup>b</sup><br>0,464 <sup>c</sup>    | N/A                                                                 |
| n (%)<br>(N)                                             |                 | ≤3-fold<br>upper<br>range<br>K 46.8<br>M 102.6  | n=95<br>75,4<br>(126)                       | n=464<br>85,6<br>(542)                      | n=54<br>60,7<br>(89)                     | n=149<br>71,3<br>(209)                      | n=51<br>58,6<br>(87)                     | n=49<br>51,6<br>(95)                             | 0,016   | <0.0001 | 0,0934 <sup>a</sup><br>0,0438 <sup>b</sup><br>1 <sup>c</sup>     | <0.0001 <sup>a</sup><br><0.0001 <sup>b</sup><br>0,0039 <sup>c</sup> |
|                                                          |                 | > 3-fold<br>upper<br>range<br>K 46.8<br>M 102.6 | n=31<br>24,6<br>(126)                       | n=78<br>14,4<br>(542)                       | n=35<br>39,3<br>(89)                     | n=60<br>28,7<br>(209)                       | n=36<br>41,4<br>(87)                     | n=46<br>48,4<br>(95)                             |         |         |                                                                  |                                                                     |
| LDL-<br>cholesterol,<br>mean±SD<br>min-max<br>(N)        |                 | mg/dl                                           | 96,3±50,1<br>3<br>27,0-<br>248,0<br>(58)    | 99,8±50,74<br>6,0-510,0<br>(170)            | 86,1±42,39<br>37,0-187,0<br>(42)         | 87,9±39,67<br>17,0-230,0<br>(85)            | 70,5±41,49<br>14,0-187,0<br>(39)         | 76,5±43,76<br>6,0-210,0<br>(46)                  | 0,025   | 0,0063  | 0,52 <sup>a</sup><br>0,019 <sup>b</sup><br>0,219 <sup>c</sup>    | 0,103 <sup>a</sup><br>0,008 <sup>b</sup><br>0,312 <sup>c</sup>      |
| n (%)<br>(N)                                             |                 | >115<br>mg/dL                                   | n=18<br>31,0<br>(58)                        | n=53<br>31,2<br>(170)                       | n=12<br>28,6<br>(42)                     | n=17<br>20,0<br>(85)                        | n=7<br>17,9<br>(39)                      | n=7<br>15,2<br>(46)                              | 0,339   | 0,0337  | N/A                                                              | 0,2475 <sup>a</sup><br>0,151 <sup>b</sup><br>1 <sup>c</sup>         |
|                                                          |                 | ≤115<br>mg/dL                                   | n=40<br>69,0<br>(58)                        | n=117<br>68,8<br>(170)                      | n=30<br>71,4<br>(42)                     | n=68<br>80,0<br>(85)                        | n=32<br>82,1<br>(39)                     | n=39<br>84,8<br>(46)                             |         |         |                                                                  |                                                                     |
| HDL-<br>cholesterol<br>mean±SD<br>min-max<br>(N)         |                 | mg/dl                                           | 38,8±14,7<br>1<br>15,0-82,0<br>(58)         | 39,9±16,43<br>2,0-120,0<br>(174)            | 39,2±13,23<br>17,0-73,0<br>(42)          | 40,7±16,29<br>7,0-110,0<br>(85)             | 34,5±13,81<br>17,0-68,0<br>(38)          | 38,2±14,85<br>8,0-79,0<br>(45)                   | 0,237   | 0,6911  | N/A                                                              | N/A                                                                 |
| Triglycerides<br>mean±SD<br>min-max<br>(N)               |                 | mg/dl                                           | 187,8±10<br>7,13<br>44,0-<br>760,0<br>(90)  | 173,6±127,2<br>8<br>40,0-1100,0<br>(261)    | 146,4±77,58<br>54,0-507,0                | 144,3±105,4<br>4<br>48,0-595,0<br>(110)     | 130,6±48,92<br>53,0-282,0                | 125,9±71,2<br>1<br>16,0-413,0<br>(58)            | 0,0002  | 0,00051 | 0,025 <sup>a</sup><br><0.0001 <sup>b</sup><br>0,434 <sup>c</sup> | 0,058 <sup>a</sup><br>0,00042 <sup>b</sup><br>0,379 <sup>c</sup>    |
| n (%)<br>(N)                                             |                 | >150<br>mg/dL                                   | n=52<br>57,8<br>(90)                        | n=117<br>44,8<br>(261)                      | n=20<br>39,2<br>(51)                     | n=30<br>27,3<br>(110)                       | n=20<br>36,4<br>(55)                     | n=15<br>25,9<br>(58)                             | 0,019   | 0,0008  | 0,1559 <sup>a</sup><br>0,0592 <sup>b</sup><br>1 <sup>c</sup>     | 0,007 <sup>a</sup><br>0,0367 <sup>b</sup><br>1 <sup>c</sup>         |
|                                                          |                 | ≤150<br>mg/dL                                   | n=38<br>42,2<br>(90)                        | n=144<br>55,2<br>(261)                      | n=31<br>60,8<br>(51)                     | n=80<br>72,7<br>(110)                       | n=35<br>63,6<br>(55)                     | n=43<br>74,1<br>(58)                             |         |         |                                                                  |                                                                     |
| Hormones                                                 |                 |                                                 |                                             |                                             |                                          |                                             |                                          |                                                  |         |         |                                                                  |                                                                     |
| 25-<br>hydroxyvita<br>min D<br>mean±SD<br>min-max<br>(N) |                 | ng/ml                                           | 24,1±14,5<br>7<br>4,0-73,2<br>(56)          | 25,0±18,33<br>3,5-146,1<br>(243)            | 23,8±15,84<br>4,9-75,6<br>(35)           | 25,1±17,12<br>3,5-77,7<br>(71)              | 16,4±11,86<br>3,5-44,6<br>(29)           | 21,7±16,69<br>3,5-63,5<br>(32)                   | 0,025   | 0,5616  | 0,995 <sup>a</sup><br>0,029 <sup>b</sup><br>0,092 <sup>c</sup>   | N/A                                                                 |
| TSH<br>mean±SD<br>min-max<br>(N)                         |                 | mIU/l                                           | 1,4±2,56<br>0,08-18,6<br>(86)               | 1,3±1,18<br>0-8,09<br>(346)                 | 2,1±3,98<br>0,01-28,81<br>(68)           | 1,3±1,32<br>0,01-12,1<br>(159)              | 1,7±1,56<br>0-7,86<br>(70)               | 2,8±5,39<br>0-38,24<br>(72)                      | 0,403   | 0,0739  | N/A                                                              | N/A                                                                 |
| fT4<br>mean±SD<br>min-max<br>(N)                         |                 | pmol/L,                                         | 12,4±2,20<br>6,79-<br>15,96<br>(35)         | 12,8±3,1<br>6,68-33,47<br>(144)             | 12,9±2,49<br>5,92-18,54<br>(31)          | 12,7±3,87<br>6,18-36,6<br>(58)              | 13,32±3,31<br>8,15-22,42<br>(32)         | 13,5±4,92<br>7,87-35,46<br>(28)                  | 0,380   | 0,739   | N/A                                                              | N/A                                                                 |
| fT3<br>mean±SD<br>min-max<br>(N)                         |                 | pmol/l                                          | 2,0±0,65<br>0,96-3,64<br>(34)               | 2,4±2,11<br>0,95-25,25<br>(138)             | 1,7±0,61<br>0,95-3,01<br>(28)            | 1,9±0,82<br>0,95-4,45<br>(53)               | 1,8±0,67<br>0,95-4,13<br>(28)            | 2,3±1,33<br>0,98-6,85<br>(23)                    | 0,206   | 0,0338  | N/A                                                              | 0,03 <sup>a</sup><br>0,9 <sup>b</sup><br>0,393 <sup>c</sup>         |
| Cortisol<br>mean±SD<br>min-max<br>(N)                    |                 | µg/dl                                           | 13,4±14,8<br>9<br>0,8-57,5<br>(13)          | 13,8±16,64<br>0,1-119,6<br>(65)             | 18,8±19,01<br>1,0-59,8<br>(7)            | 12,7±10,56<br>1,9-42,3<br>(15)              | 14,9±9,30<br>0,9-29,6<br>(9)             | 9,6±4,96<br>2,3-17,4<br>(8)                      | 0,816   | 0,3064  | N/A                                                              | N/A                                                                 |

Suppl. Table S3. Therapies applied during the hospitalisation in the diabetic and non-diabetic cohort.

| Variables, units                          | Low risk<br>[0-1] |                            | Medium<br>[2-3]    |                           | High risk<br>[≥4] |                           | ANOVA<br>P value |                  | P value for<br>post-hoc analysis in<br>significant ANOVA<br>L-M a<br>L-H b<br>M-H c |                                   |
|-------------------------------------------|-------------------|----------------------------|--------------------|---------------------------|-------------------|---------------------------|------------------|------------------|-------------------------------------------------------------------------------------|-----------------------------------|
|                                           | Diabetes<br>N=209 | Non-<br>Diabetes<br>N=1183 | Diabetes<br>N= 146 | Non-<br>Diabetes<br>N=337 | Diabetes<br>N=118 | Non-<br>Diabetes<br>N=146 | Diabetes         | Non-<br>Diabetes | Diabetes                                                                            | Non-<br>Diabetes                  |
| Systemic<br>corticosteroid,<br>n<br>n (%) | 117<br>(56,0)     | 579<br>(48,9)              | 77<br>(52,7)       | 165<br>(49,0)             | 57<br>(48,3)      | 81<br>(55,5)              | 0,407973         | 0,320829         | N/A                                                                                 | N/A                               |
| Convalescent<br>plasma,<br>n<br>n (%)     | 31<br>(14,8)      | 134<br>(11,3)              | 15<br>(10,3)       | 26<br>(7,7)               | 14<br>(11,9)      | 17<br>(11,6)              | 0,42653          | 0,151155         | N/A                                                                                 | N/A                               |
| Tocilizumab,<br>n<br>n (%)                | 2<br>(1,0)        | 20<br>(1,7)                | 1<br>(0,7)         | 1<br>(0,3)                | 1<br>(0,8)        | 0<br>(0,0)                | 1,0              | 0,054935         | N/A                                                                                 | N/A                               |
| Remdesivir,<br>n<br>n (%)                 | 38<br>(18,2)      | 196<br>(16,6)              | 14<br>(9,6)        | 56<br>(16,6)              | 14<br>(11,9)      | 21<br>(14,4)              | 0,053466         | 0,790951         | N/A                                                                                 | N/A                               |
| Antibiotic,<br>n<br>n (%)                 | 139<br>(66,5)     | 592<br>(50,0)              | 100<br>(68,5)      | 200<br>(59,3)             | 82<br>(69,5)      | 103<br>(70,5)             | 0,841033         | <0.0001          | N/A                                                                                 | 0,0094 a<br><0.0001 b<br>0,0761 c |

Suppl. Table S4. The Log-rank statistics for matching the C2HEST risk strata for total mortality in diabetic and non-diabetic cohort.

| DIABETICS | h2      | h3      | h4      | h5      | h6      | h7      | h8     |
|-----------|---------|---------|---------|---------|---------|---------|--------|
| m1        | 38.8304 | 35.091  | 20.0129 | 16.6071 | 15.5571 | 4.7492  | 2.1734 |
| m2        |         | 41.2091 | 40.319  | 41.4568 | 42.7869 | 38.9894 | 6.2263 |
| m3        |         |         | 35.3244 | 36.5235 | 37.9713 | 35.3315 | 5.9124 |
| m4        |         |         |         | 19.3965 | 20.8289 | 18.7107 | 4.2634 |
| m5        |         |         |         |         | 15.2157 | 14.8423 | 3.7087 |
| m6        |         |         |         |         |         | 14.603  | 3.4843 |
| m7        |         |         |         |         |         |         | 0.2581 |

| NON-DIABETICS | h2       | h3       | h4       | h5       | h6       | h7       | h8      |
|---------------|----------|----------|----------|----------|----------|----------|---------|
| m1            | 214.2007 | 182.8439 | 193.6593 | 164.2116 | 132.8852 | 134.8876 | 11.4564 |
| m2            |          | 208.9715 | 227.9922 | 217.4597 | 205.7872 | 207.3228 | 14.344  |
| m3            |          |          | 157.3889 | 146.7787 | 138.1358 | 139.0401 | 11.7401 |

|    |  |  |  |          |          |          |         |
|----|--|--|--|----------|----------|----------|---------|
| m4 |  |  |  | 122.9856 | 127.4897 | 123.0078 | 11.0815 |
| m5 |  |  |  |          | 73.2758  | 66.1284  | 8.1231  |
| m6 |  |  |  |          |          | 10.0848  | 2.8032  |
| m7 |  |  |  |          |          |          | 2.5976  |

m-medium, h-high

**Suppl. Table S5.** The Log-rank statistics for matching the C2HEST risk strata for in-hospital mortality in diabetic and non-diabetic cohort.

| DIABETICS | h2      | h3      | h4      | h5      | h6             | h7      | h8     |
|-----------|---------|---------|---------|---------|----------------|---------|--------|
| m1        | 14.4123 | 13.6351 | 4.4525  | 3.4907  | 8.9395         | 1.2788  | 0.8757 |
| <b>m2</b> |         | 15.3486 | 14.0526 | 14.2558 | <b>18.2982</b> | 14.1303 | 3.7454 |
| m3        |         |         | 13.7242 | 13.5861 | 17.0953        | 13.6078 | 3.6824 |
| m4        |         |         |         | 4.4599  | 9.1179         | 4.3109  | 2.0553 |
| m5        |         |         |         |         | 8.7966         | 3.106   | 1.7534 |
| m6        |         |         |         |         |                | 9.0862  | 2.9295 |
| m7        |         |         |         |         |                |         | 0.7543 |

| NON-DIABETIC | h2      | h3      | h4             | h5      | h6      | h7      | h8     |
|--------------|---------|---------|----------------|---------|---------|---------|--------|
| m1           | 51.6561 | 51.3363 | 58.8525        | 47.6171 | 27.0761 | 34.1247 | 4.9027 |
| <b>m2</b>    |         | 57.4548 | <b>68.9848</b> | 64.3097 | 52.347  | 59.3837 | 7.1777 |
| m3           |         |         | 59.5348        | 56.4524 | 48.0836 | 54.6571 | 6.9204 |
| m4           |         |         |                | 52.1425 | 51.4903 | 55.4325 | 7.1361 |
| m5           |         |         |                |         | 35.9538 | 37.6049 | 5.8164 |
| m6           |         |         |                |         |         | 12.8644 | 2.385  |
| m7           |         |         |                |         |         |         | 3.4673 |

m-medium, h-high

**Suppl. Table S6.** Odds ratios for quantifying the strength of the association between CH2EST-score and study endpoints and adverse events in diabetic and non-diabetic cohort

| Endpoint – DIABETIC cohort     | Comparison    | OR    | CI min. | CI max. | P value |
|--------------------------------|---------------|-------|---------|---------|---------|
| End of hospitalization - death | overall       | 0.817 | 0.733   | 0.908   | 0.0002  |
|                                | low vs medium | 0.461 | 0.299   | 0.709   | 0.0004  |
|                                | low vs high   | 0.425 | 0.266   | 0.674   | 0.0003  |

|                                         |               |        |       |             |          |
|-----------------------------------------|---------------|--------|-------|-------------|----------|
| End of hospitalization – deterioration  | overall       | 1.044  | 0.906 | 1.198       | 0.546    |
|                                         | low vs medium | 1.272  | 0.700 | 2.297       | 0.4259   |
|                                         | low vs high   | 1.319  | 0.699 | 2.453       | 0.3844   |
| End of hospitalization - rehabilitation | overall       | 0.979  | 0.842 | 1.131       | 0.778    |
|                                         | low vs medium | 1.221  | 0.674 | 2.195       | 0.5054   |
|                                         | low vs high   | 0.836  | 0.412 | 1.627       | 0.6056   |
| End of hospitalization – full recovery  | overall       | 1.269  | 1.130 | 1.428       | < 0.0001 |
|                                         | low vs medium | 2.234  | 1.332 | 3.778       | 0.0024   |
|                                         | low vs high   | 2.945  | 1.732 | 5.054       | < 0.0001 |
| Shock – all cause                       | overall       | 0.976  | 0.832 | 1.137       | 0.7636   |
|                                         | low vs medium | 0.658  | 0.326 | 1.274       | 0.2256   |
|                                         | low vs high   | 0.974  | 0.495 | 1.857       | 0.9365   |
| Cardiogenic shock                       | overall       | 1.532  | 1.163 | 2.044       | 0.0026   |
|                                         | low vs medium | 2.915  | 0.561 | 21.234      | 0.2202   |
|                                         | low vs high   | 7.527  | 1.848 | 50.448      | 0.0116   |
| Septic shock                            | overall       | 0.919  | 0.767 | 1.089       | 0.3441   |
|                                         | low vs medium | 0.496  | 0.222 | 1.028       | 0.0698   |
|                                         | low vs high   | 0.763  | 0.359 | 1.537       | 0.4623   |
| Pulmonary embolism                      | overall       | 0.902  | 0.698 | 1.136       | 0.4016   |
|                                         | low vs medium | 0.990  | 0.399 | 2.361       | 0.9829   |
|                                         | low vs high   | 0.393  | 0.089 | 1.251       | 0.1519   |
| Deep vein thrombosis                    | overall       | 0.764  | 0.286 | 1.485       | 0.4975   |
|                                         | low vs medium | 0.714  | 0.033 | 7.519       | 0.7839   |
|                                         | low vs high   | NA     | NA    | NA          | NA       |
| Myocardial infarction                   | overall       | 1.152  | 0.838 | 1.552       | 0.3616   |
|                                         | low vs medium | 1.444  | 0.336 | 6.196       | 0.6078   |
|                                         | low vs high   | 1.798  | 0.418 | 7.735       | 0.4129   |
| Myocardial injury                       | overall       | 1.173  | 1.033 | 1.334       | 0.0142   |
|                                         | low vs medium | 1.986  | 1.106 | 3.591       | 0.0221   |
|                                         | low vs high   | 2.163  | 1.204 | 3.917       | 0.0102   |
| Acute heart failure                     | overall       | 1.943  | 1.586 | 2.425       | < 0.0001 |
|                                         | low vs medium | 6.799  | 1.720 | 45.041      | 0.0152   |
|                                         | low vs high   | 25.058 | 7.215 | 158.17<br>1 | < 0.0001 |
| Stroke/TIA                              | overall       | 1.066  | 0.784 | 1.413       | 0.6662   |
|                                         | low vs medium | 2.971  | 0.917 | 11.308      | 0.0801   |
|                                         | low vs high   | 0.884  | 0.121 | 4.598       | 0.8874   |
| Complete respiratory failure            | overall       | 1.294  | 1.022 | 1.668       | 0.0377   |
|                                         | low vs medium | 1.961  | 0.754 | 5.245       | 0.1712   |
|                                         | low vs high   | 2.745  | 1.016 | 7.826       | 0.0509   |
| SIRS                                    | overall       | 1.053  | 0.900 | 1.225       | 0.5087   |
|                                         | low vs medium | 1.049  | 0.532 | 2.033       | 0.8891   |
|                                         | low vs high   | 1.339  | 0.675 | 2.613       | 0.3945   |
| SEPSIS                                  | overall       | 1.154  | 0.802 | 1.639       | 0.4213   |
|                                         | low vs medium | 2.941  | 0.553 | 21.786      | 0.2228   |
|                                         | low vs high   | 1.415  | 0.166 | 12.097      | 0.7325   |
| Acute kidney injury                     | overall       | 1.205  | 1.061 | 1.369       | 0.0041   |
|                                         | low vs medium | 1.467  | 0.821 | 2.617       | 0.1933   |
|                                         | low vs high   | 2.303  | 1.301 | 4.097       | 0.0042   |
| Acute liver dysfunction.                | overall       | 1.193  | 0.924 | 1.524       | 0.1626   |
|                                         | low vs medium | 1.221  | 0.346 | 4.136       | 0.7455   |
|                                         | low vs high   | 2.196  | 0.712 | 6.986       | 0.1673   |
| MODS                                    | overall       | 1.310  | 0.940 | 1.813       | 0.101    |
|                                         | low vs medium | 2.171  | 0.356 | 16.641      | 0.399    |
|                                         | low vs high   | 4.580  | 0.970 | 32.334      | 0.0717   |
| All bleedings                           | overall       | 1.050  | 0.863 | 1.264       | 0.6167   |
|                                         | low vs medium | 0.850  | 0.348 | 1.966       | 0.7087   |
|                                         | low vs high   | 1.330  | 0.576 | 2.982       | 0.4922   |
| Intracranial bleeding                   | overall       | 0.822  | 0.449 | 1.312       | 0.4594   |
|                                         | low vs medium | 1.441  | 0.263 | 7.879       | 0.6577   |

|                            |               |       |       |        |        |
|----------------------------|---------------|-------|-------|--------|--------|
|                            | low vs high   | NA    | NA    | NA     | NA     |
| Respiratory tract bleeding | overall       | 1.005 | 0.721 | 1.353  | 0.9759 |
|                            | low vs medium | 0.710 | 0.148 | 2.737  | 0.6319 |
|                            | low vs high   | 1.187 | 0.298 | 4.242  | 0.7937 |
| Upper-GI-tract bleeding    | overall       | 0.938 | 0.640 | 1.306  | 0.7218 |
|                            | low vs medium | 0.470 | 0.068 | 2.073  | 0.3592 |
|                            | low vs high   | 0.883 | 0.184 | 3.412  | 0.8617 |
| Lower-GI- tract bleeding   | overall       | 1.202 | 0.623 | 2.171  | 0.5408 |
|                            | low vs medium | NA    | NA    | NA     | NA     |
|                            | low vs high   | 3.586 | 0.340 | 77.658 | 0.2992 |
| Urinary tract bleeding     | overall       | 1.111 | 0.721 | 1.638  | 0.6056 |
|                            | low vs medium | 0.954 | 0.124 | 5.825  | 0.9589 |
|                            | low vs high   | 1.184 | 0.154 | 7.243  | 0.8544 |
| Pneumonia                  | overall       | 1.076 | 0.968 | 1.199  | 0.1778 |
|                            | low vs medium | 1.038 | 0.673 | 1.605  | 0.8673 |
|                            | low vs high   | 1.213 | 0.760 | 1.949  | 0.4212 |

| Endpoint – NON-DIABETIC cohort          | Comparison    | OR     | CI min. | CI max.     | P value  |
|-----------------------------------------|---------------|--------|---------|-------------|----------|
| End of hospitalization - death          | overall       | 0.706  | 0.658   | 0.756       | < 0.0001 |
|                                         | low vs medium | 0.370  | 0.288   | 0.474       | < 0.0001 |
|                                         | low vs high   | 0.243  | 0.169   | 0.346       | < 0.0001 |
| End of hospitalization – deterioration  | overall       | 1.197  | 1.096   | 1.303       | < 0.0001 |
|                                         | low vs medium | 2.532  | 1.819   | 3.507       | < 0.0001 |
|                                         | low vs high   | 1.806  | 1.088   | 2.890       | 0.0172   |
| End of hospitalization - rehabilitation | overall       | 0.961  | 0.863   | 1.063       | 0.4537   |
|                                         | low vs medium | 0.978  | 0.660   | 1.420       | 0.9108   |
|                                         | low vs high   | 0.752  | 0.396   | 1.319       | 0.3503   |
| End of hospitalization – full recovery  | overall       | 1.582  | 1.455   | 1.721       | < 0.0001 |
|                                         | low vs medium | 3.087  | 2.172   | 4.372       | < 0.0001 |
|                                         | low vs high   | 7.582  | 5.062   | 11.326      | < 0.0001 |
| Shock – all cause                       | overall       | 1.172  | 1.049   | 1.302       | 0.004    |
|                                         | low vs medium | 1.371  | 0.866   | 2.119       | 0.1651   |
|                                         | low vs high   | 1.793  | 0.983   | 3.090       | 0.0443   |
| Cardiogenic shock                       | overall       | 1.636  | 1.307   | 2.041       | < 0.0001 |
|                                         | low vs medium | 4.998  | 1.585   | 16.981      | 0.0063   |
|                                         | low vs high   | 10.097 | 3.004   | 35.441      | 0.0002   |
| Septic shock                            | overall       | 1.103  | 0.961   | 1.253       | 0.1462   |
|                                         | low vs medium | 1.094  | 0.619   | 1.847       | 0.7446   |
|                                         | low vs high   | 1.274  | 0.578   | 2.504       | 0.5119   |
| Pulmonary embolism                      | overall       | 1.117  | 0.981   | 1.260       | 0.0838   |
|                                         | low vs medium | 1.062  | 0.611   | 1.766       | 0.8227   |
|                                         | low vs high   | 1.592  | 0.800   | 2.925       | 0.1562   |
| Deep vein thrombosis                    | overall       | 1.098  | 0.797   | 1.432       | 0.5243   |
|                                         | low vs medium | 0.876  | 0.199   | 2.778       | 0.8389   |
|                                         | low vs high   | 1.355  | 0.210   | 5.035       | 0.6925   |
| Myocardial infarction                   | overall       | 1.471  | 1.113   | 1.906       | 0.0042   |
|                                         | low vs medium | 5.343  | 1.517   | 21.002      | 0.0098   |
|                                         | low vs high   | 6.184  | 1.208   | 28.319      | 0.0178   |
| Myocardial injury                       | overall       | 1.444  | 1.312   | 1.593       | < 0.0001 |
|                                         | low vs medium | 2.395  | 1.629   | 3.514       | < 0.0001 |
|                                         | low vs high   | 5.585  | 3.496   | 8.940       | < 0.0001 |
| Acute heart failure                     | overall       | 2.066  | 1.767   | 2.439       | < 0.0001 |
|                                         | low vs medium | 7.871  | 3.085   | 22.552      | < 0.0001 |
|                                         | low vs high   | 36.682 | 15.579  | 100.86<br>0 | < 0.0001 |
| Stroke/TIA                              | overall       | 1.216  | 0.968   | 1.490       | 0.073    |
|                                         | low vs medium | 2.752  | 1.165   | 6.313       | 0.0173   |
|                                         | low vs high   | 1.888  | 0.429   | 5.942       | 0.3256   |

|                              |               |       |       |        |          |
|------------------------------|---------------|-------|-------|--------|----------|
| Complete respiratory failure | overall       | 1.167 | 0.995 | 1.377  | 0.0614   |
|                              | low vs medium | 0.978 | 0.494 | 1.930  | 0.9483   |
|                              | low vs high   | 1.909 | 0.859 | 4.378  | 0.1176   |
| SIRS                         | overall       | 0.998 | 0.893 | 1.109  | 0.9781   |
|                              | low vs medium | 0.701 | 0.438 | 1.082  | 0.1222   |
|                              | low vs high   | 1.306 | 0.757 | 2.149  | 0.313    |
| SEPSIS                       | overall       | 1.432 | 1.097 | 1.836  | 0.0054   |
|                              | low vs medium | 1.136 | 0.168 | 4.770  | 0.8749   |
|                              | low vs high   | 5.775 | 1.664 | 18.671 | 0.0036   |
| Acute kidney injury          | overall       | 1.299 | 1.180 | 1.427  | < 0.0001 |
|                              | low vs medium | 1.781 | 1.180 | 2.647  | 0.005    |
|                              | low vs high   | 2.811 | 1.701 | 4.513  | < 0.0001 |
| Acute liver dysfunction.     | overall       | 1.300 | 1.109 | 1.510  | 0.0008   |
|                              | low vs medium | 2.361 | 1.233 | 4.427  | 0.008    |
|                              | low vs high   | 2.320 | 0.908 | 5.227  | 0.0557   |
| MODS                         | overall       | 1.106 | 0.864 | 1.369  | 0.3872   |
|                              | low vs medium | 0.923 | 0.304 | 2.314  | 0.8737   |
|                              | low vs high   | 1.285 | 0.299 | 3.830  | 0.6892   |
| All bleedings                | overall       | 1.211 | 1.061 | 1.371  | 0.0034   |
|                              | low vs medium | 1.179 | 0.641 | 2.058  | 0.5781   |
|                              | low vs high   | 2.508 | 1.301 | 4.556  | 0.0038   |
| Intracranial bleeding        | overall       | 1.168 | 0.849 | 1.528  | 0.291    |
|                              | low vs medium | 1.965 | 0.600 | 5.726  | 0.2289   |
|                              | low vs high   | 0.900 | 0.049 | 4.837  | 0.9203   |
| Respiratory tract bleeding   | overall       | 0.989 | 0.715 | 1.287  | 0.938    |
|                              | low vs medium | 0.204 | 0.011 | 0.999  | 0.1232   |
|                              | low vs high   | 1.439 | 0.333 | 4.348  | 0.5651   |
| Upper-GI-tract bleeding      | overall       | 1.492 | 1.202 | 1.834  | 0.0002   |
|                              | low vs medium | 2.662 | 0.871 | 7.708  | 0.0716   |
|                              | low vs high   | 7.397 | 2.558 | 20.912 | 0.0001   |
| Lower-GI- tract bleeding     | overall       | 1.020 | 0.536 | 1.598  | 0.9403   |
|                              | low vs medium | 0.701 | 0.037 | 4.367  | 0.7463   |
|                              | low vs high   | NA    | NA    | NA     | NA       |
| Urinary tract bleeding       | overall       | 1.305 | 0.932 | 1.746  | 0.0901   |
|                              | low vs medium | 1.171 | 0.171 | 5.110  | 0.847    |
|                              | low vs high   | 4.115 | 0.861 | 15.777 | 0.0471   |
| Pneumonia                    | overall       | 1.350 | 1.259 | 1.451  | < 0.0001 |
|                              | low vs medium | 1.936 | 1.512 | 2.485  | < 0.0001 |
|                              | low vs high   | 2.714 | 1.884 | 3.968  | < 0.0001 |

**Supplementary Table S7.** Discriminatory performance of the C<sub>2</sub>HES<sub>T</sub> score on the clinical events in diabetic and non-diabetic cohorts

| CLINICAL EVENT – DIABETIC COHORT        | AUC       | SENSITIVITY | SPECIFICITY |
|-----------------------------------------|-----------|-------------|-------------|
| End of hospitalization - full recovery  | 0.6024071 | 0.5479452   | 0.6496063   |
| End of hospitalization - deterioration  | 0.5254052 | 0.6111111   | 0.4513716   |
| End of hospitalization - rehabilitation | 0.4946327 | 0.9104478   | 0.1083744   |
| End of hospitalization - death          | 0.6240952 | 0.7217391   | 0.4944134   |
| All-cause shock                         | 0.4875133 | 0.2711864   | 0.7536232   |
| Hypovolemic shock                       | 0.6439176 | 0.8888889   | 0.4525862   |
| Cardiogenic shock                       | 0.7252568 | 0.5714286   | 0.7603486   |
| Septic shock                            | 0.5416827 | 0.5510204   | 0.5707547   |
| Pulmonary embolism                      | 0.5465179 | 0.8800000   | 0.2566964   |
| Deep vein thrombosis                    | 0.6007092 | 1.0000000   | 0.2510638   |
| Venous thromboembolic disease           | 0.5465179 | 0.8800000   | 0.2566964   |
| Myocardial infarction                   | 0.5928236 | 0.6666667   | 0.5596529   |
| Myocardial injury                       | 0.5962990 | 0.6960784   | 0.4750000   |
| Acute heart failure                     | 0.8186051 | 0.8823529   | 0.5876993   |
| Stroke/TIA                              | 0.5565671 | 0.7142857   | 0.4466231   |

| CLINICAL EVENT – DIABETIC COHORT | AUC       | SENSITIVITY | SPECIFICITY |
|----------------------------------|-----------|-------------|-------------|
| Complete respiratory failure     | 0.6213204 | 0.5862069   | 0.6341463   |
| SIRS                             | 0.5165456 | 0.5087719   | 0.5593220   |
| Sepsis                           | 0.5834497 | 0.7500000   | 0.4189944   |
| Acute kidney injury              | 0.6031639 | 0.5813953   | 0.5839793   |
| Acute liver dysfunction          | 0.5929412 | 0.2777778   | 0.8729412   |
| MODS                             | 0.6596112 | 0.8000000   | 0.5615551   |
| All bleedings                    | 0.5166667 | 0.1428571   | 0.9337900   |
| Intracranial bleeding            | 0.5635261 | 1.0000000   | 0.2526767   |
| Respiratory tract bleeding       | 0.4903010 | 0.1538462   | 0.9304348   |
| Upper-GI-tract bleeding          | 0.5453562 | 0.5454545   | 0.5606061   |
| Lower-GI-tract-bleeding          | 0.6312057 | 0.6666667   | 0.7531915   |
| Urinary tract bleeding           | 0.5234519 | 0.2857143   | 0.9313305   |
| Pneumonia                        | 0.5348402 | 0.4659864   | 0.5865922   |

| CLINICAL EVENT – NON-DIABETIC COHORT    | AUC       | SENSITIVITY | SPECIFICITY |
|-----------------------------------------|-----------|-------------|-------------|
| End of hospitalization - full recovery  | 0.6449670 | 0.7945845   | 0.4420168   |
| End of hospitalization - deterioration  | 0.5979705 | 0.4558824   | 0.7332421   |
| End of hospitalization - rehabilitation | 0.4948965 | 0.5026738   | 0.5043949   |
| End of hospitalization - death          | 0.7165027 | 0.5833333   | 0.7510260   |
| All-cause shock                         | 0.5923052 | 0.6776860   | 0.5177994   |
| Hypovolemic shock                       | 0.6020403 | 0.6923077   | 0.5067073   |
| Cardiogenic shock                       | 0.7493595 | 0.7222222   | 0.7148058   |
| Septic shock                            | 0.5668229 | 0.6588235   | 0.5123340   |
| Pulmonary embolism                      | 0.5395282 | 0.2446809   | 0.8237913   |
| Deep vein thrombosis                    | 0.4982521 | 0.1176471   | 0.9836264   |
| Venous thromboembolic disease           | 0.5342675 | 0.2376238   | 0.8236422   |
| Myocardial infarction                   | 0.7249058 | 0.6923077   | 0.7132486   |
| Myocardial injury                       | 0.6678092 | 0.5760870   | 0.7009063   |
| Acute heart failure                     | 0.8675009 | 0.8571429   | 0.7247537   |
| Stroke/TIA                              | 0.6088415 | 0.5000000   | 0.7134146   |
| Complete respiratory failure            | 0.5578676 | 0.2183908   | 0.9425287   |
| SIRS                                    | 0.5165473 | 0.5312500   | 0.5187500   |
| Sepsis                                  | 0.6915287 | 0.5000000   | 0.8201220   |
| Acute kidney injury                     | 0.6272756 | 0.6896552   | 0.5220250   |
| Acute liver dysfunction                 | 0.6590205 | 0.8125000   | 0.4868056   |
| MODS                                    | 0.5569792 | 0.6296296   | 0.5057962   |
| All bleedings                           | 0.5724504 | 0.2948718   | 0.8255668   |
| Intracranial bleeding                   | 0.5760549 | 0.4000000   | 0.8219261   |
| Respiratory tract bleeding              | 0.4778550 | 0.1428571   | 0.9130699   |
| Upper-GI-tract bleeding                 | 0.6978289 | 0.6190476   | 0.7142857   |
| Lower-GI-tract-bleeding                 | 0.5912149 | 0.8333333   | 0.5048193   |
| Urinary tract bleeding                  | 0.5825872 | 0.2727273   | 0.9558912   |
| Pneumonia                               | 0.6273602 | 0.6137690   | 0.6279357   |

**Supplementary Table S8.** The in-hospital all-cause-death Hazard Ratios for modified C2HEST risk stratification - Replace “thyroid disease” by “hypothyroidism” and “age>75 years” by “age>65 years” in diabetes cohort



| Total deaths<br>– DIABETIC COHORT | HR       | CI min.   | CI max.  | p-value   |
|-----------------------------------|----------|-----------|----------|-----------|
| Overall                           | 1.207286 | 1.0841998 | 1.344345 | 0.0005959 |
| low vs medium                     | 1.683207 | 0.6456338 | 4.388225 | 0.2868538 |
| low vs high                       | 2.499916 | 1.0123108 | 6.173576 | 0.0469788 |

| Total deaths – NON-<br>DIABETIC COHORT | HR       | CI min.  | CI max. | p-value |
|----------------------------------------|----------|----------|---------|---------|
| Overall                                | 1.336532 | 1.246332 | 1.43326 | 0       |
| low vs medium                          | 2.458144 | NA       | NA      | NA      |
| low vs high                            | 4.014245 | NA       | NA      | NA      |

**Suppl. Table S9.** Odds ratios for quantifying the strength of the association between the modified CH2EST-score and study endpoints and adverse events - replacing "thyroid disease" with "hypothyroidism" and cut-off point for age to ">65 years" as scoring items in diabetic and non-diabetic cohorts.

| Endpoint – DIABETIC COHORT              | Comparison    | OR    | CI min. | CI max. | P value |
|-----------------------------------------|---------------|-------|---------|---------|---------|
| End of hospitalization - death          | overall       | 1.256 | 1.107   | 1.431   | 0.0005  |
|                                         | low vs medium | 2.112 | 0.812   | 6.595   | 0.1535  |
|                                         | low vs high   | 2.938 | 1.221   | 8.743   | 0.0285  |
| End of hospitalization - deterioration  | overall       | 1.074 | 0.927   | 1.246   | 0.3443  |
|                                         | low vs medium | 0.798 | 0.314   | 2.213   | 0.646   |
|                                         | low vs high   | 1.004 | 0.446   | 2.572   | 0.993   |
| End of hospitalization - rehabilitation | overall       | 0.935 | 0.802   | 1.089   | 0.3913  |
|                                         | low vs medium | 0.975 | 0.393   | 2.665   | 0.9582  |
|                                         | low vs high   | 0.815 | 0.358   | 2.102   | 0.6452  |
| End of hospitalization - full recovery  | overall       | 0.841 | 0.753   | 0.937   | 0.0019  |
|                                         | low vs medium | 0.760 | 0.376   | 1.517   | 0.4384  |
|                                         | low vs high   | 0.581 | 0.304   | 1.095   | 0.0951  |
| All-cause shock                         | overall       | 1.006 | 0.856   | 1.181   | 0.9441  |
|                                         | low vs medium | 0.630 | 0.239   | 1.786   | 0.3618  |
|                                         | low vs high   | 0.769 | 0.337   | 1.989   | 0.5566  |
| Hypovolemic shock                       | overall       | 0.699 | 0.455   | 1.041   | 0.0864  |
|                                         | low vs medium | 0.712 | 0.134   | 5.269   | 0.7008  |
|                                         | low vs high   | 0.207 | 0.033   | 1.607   | 0.0897  |
| Cardiogenic shock                       | overall       | 1.432 | 1.042   | 2.000   | 0.0296  |
|                                         | low vs medium | 0.717 | 0.067   | 15.650  | 0.7878  |
|                                         | low vs high   | 1.598 | 0.299   | 29.572  | 0.6575  |
| Septic shock                            | overall       | 0.973 | 0.817   | 1.158   | 0.7582  |
|                                         | low vs medium | 0.628 | 0.223   | 1.927   | 0.3894  |
|                                         | low vs high   | 0.737 | 0.307   | 2.057   | 0.5226  |
| pulmonary embolism                      | overall       | 0.920 | 0.723   | 1.166   | 0.494   |

| Endpoint – DIABETIC COHORT   | Comparison    | OR    | CI min. | CI max. | P value  |
|------------------------------|---------------|-------|---------|---------|----------|
|                              | low vs medium | 1.278 | 0.295   | 8.809   | 0.7651   |
|                              | low vs high   | 1.155 | 0.313   | 7.467   | 0.8515   |
| deep vein thrombosis         | overall       | 0.829 | 0.403   | 1.622   | 0.5874   |
|                              | low vs medium | NA    | NA      | NA      | NA       |
|                              | low vs high   | NA    | NA      | NA      | NA       |
| myocardial infarction        | overall       | 1.180 | 0.842   | 1.664   | 0.3378   |
|                              | low vs medium | 0.717 | 0.067   | 15.650  | 0.7878   |
|                              | low vs high   | 1.299 | 0.235   | 24.243  | 0.8064   |
| myocardial injury            | overall       | 1.189 | 1.032   | 1.376   | 0.018    |
|                              | low vs medium | 3.798 | 0.968   | 25.322  | 0.0921   |
|                              | low vs high   | 4.937 | 1.367   | 31.659  | 0.0358   |
| acute heart failure          | overall       | 1.703 | 1.364   | 2.158   | < 0.0001 |
|                              | low vs medium | 1.458 | 0.208   | 28.939  | 0.7393   |
|                              | low vs high   | 4.486 | 0.921   | 80.942  | 0.1451   |
| stroke/TIA                   | overall       | 1.048 | 0.766   | 1.435   | 0.7664   |
|                              | low vs medium | 1.084 | 0.135   | 22.235  | 0.9449   |
|                              | low vs high   | 1.448 | 0.267   | 26.899  | 0.7274   |
| complete respiratory failure | overall       | 1.143 | 0.915   | 1.442   | 0.2447   |
|                              | low vs medium | 0.738 | 0.151   | 3.436   | 0.6979   |
|                              | low vs high   | 1.367 | 0.312   | 5.653   | 0.6637   |
| SIRS                         | overall       | 1.070 | 0.909   | 1.261   | 0.4156   |
|                              | low vs medium | 0.679 | 0.261   | 1.912   | 0.4406   |
|                              | low vs high   | 0.683 | 0.297   | 1.775   | 0.3967   |
| Sepsis                       | overall       | 1.361 | 0.901   | 2.138   | 0.1558   |
|                              | low vs medium | NA    | NA      | NA      | NA       |
|                              | low vs high   | NA    | NA      | NA      | NA       |
| Acute kidney injury          | overall       | 1.186 | 1.033   | 1.366   | 0.0165   |
|                              | low vs medium | 1.845 | 0.645   | 6.657   | 0.2917   |
|                              | low vs high   | 2.582 | 0.994   | 8.834   | 0.0807   |
| Acute liver dysfunction      | overall       | 0.985 | 0.742   | 1.303   | 0.913    |
|                              | low vs medium | 2.923 | 0.512   | 55.140  | 0.3195   |
|                              | low vs high   | 1.208 | 0.218   | 22.593  | 0.8593   |
| MODS                         | overall       | 1.848 | 1.247   | 2.872   | 0.0035   |
|                              | low vs medium | NA    | NA      | NA      | NA       |
|                              | low vs high   | NA    | NA      | NA      | NA       |
| All bleedings                | overall       | 0.975 | 0.796   | 1.194   | 0.8094   |
|                              | low vs medium | 0.547 | 0.172   | 1.902   | 0.3148   |
|                              | low vs high   | 0.602 | 0.231   | 1.878   | 0.333    |
| Intracranial bleeding        | overall       | 0.779 | 0.468   | 1.256   | 0.3139   |
|                              | low vs medium | 0.355 | 0.014   | 9.117   | 0.4679   |
|                              | low vs high   | 0.568 | 0.082   | 11.243  | 0.6163   |
| Respiratory tract bleeding   | overall       | 0.940 | 0.676   | 1.300   | 0.7079   |
|                              | low vs medium | 0.083 | 0.004   | 0.578   | 0.0277   |
|                              | low vs high   | 0.268 | 0.080   | 1.039   | 0.0379   |
| Upper-GI-tract bleeding      | overall       | 0.729 | 0.497   | 1.043   | 0.0912   |
|                              | low vs medium | 0.897 | 0.186   | 6.431   | 0.8994   |
|                              | low vs high   | 0.277 | 0.052   | 2.043   | 0.1456   |
| Lower-GI-tract-bleeding      | overall       | 0.829 | 0.403   | 1.622   | 0.5874   |
|                              | low vs medium | NA    | NA      | NA      | NA       |
|                              | low vs high   | NA    | NA      | NA      | NA       |
| Urinary tract bleeding       | overall       | 0.948 | 0.605   | 1.471   | 0.8113   |
|                              | low vs medium | NA    | NA      | NA      | NA       |
|                              | low vs high   | 0.348 | 0.072   | 2.481   | 0.2154   |
| Pneumonia                    | overall       | 1.092 | 0.979   | 1.220   | 0.1177   |
|                              | low vs medium | 1.360 | 0.677   | 2.727   | 0.3846   |
|                              | low vs high   | 1.659 | 0.873   | 3.138   | 0.119    |

| Endpoint – NON-DIABETIC COHORT          | Comparison    | OR     | CI min. | CI max.  | P value  |
|-----------------------------------------|---------------|--------|---------|----------|----------|
| End of hospitalization - death          | overall       | 1.641  | 1.509   | 1.787    | < 0.0001 |
|                                         | low vs medium | 3.844  | 2.470   | 6.110    | < 0.0001 |
|                                         | low vs high   | 8.892  | 5.891   | 13.809   | < 0.0001 |
| End of hospitalization - deterioration  | overall       | 1.212  | 1.116   | 1.314    | < 0.0001 |
|                                         | low vs medium | 3.094  | 2.159   | 4.472    | < 0.0001 |
|                                         | low vs high   | 2.442  | 1.663   | 3.601    | < 0.0001 |
| End of hospitalization - rehabilitation | overall       | 1.055  | 0.965   | 1.152    | 0.2327   |
|                                         | low vs medium | 1.233  | 0.855   | 1.769    | 0.257    |
|                                         | low vs high   | 1.259  | 0.864   | 1.823    | 0.2256   |
| End of hospitalization - full recovery  | overall       | 0.674  | 0.631   | 0.718    | < 0.0001 |
|                                         | low vs medium | 0.333  | 0.259   | 0.428    | < 0.0001 |
|                                         | low vs high   | 0.224  | 0.173   | 0.290    | < 0.0001 |
| All-cause shock                         | overall       | 1.233  | 1.114   | 1.362    | < 0.0001 |
|                                         | low vs medium | 1.858  | 1.162   | 2.976    | 0.0096   |
|                                         | low vs high   | 2.518  | 1.603   | 3.984    | < 0.0001 |
| Hypovolemic shock                       | overall       | 1.183  | 0.951   | 1.449    | 0.1158   |
|                                         | low vs medium | 0.915  | 0.280   | 2.666    | 0.8744   |
|                                         | low vs high   | 2.497  | 1.048   | 6.164    | 0.0398   |
| Cardiogenic shock                       | overall       | 1.608  | 1.274   | 2.032    | < 0.0001 |
|                                         | low vs medium | 2.767  | 0.676   | 13.541   | 0.1648   |
|                                         | low vs high   | 6.261  | 1.903   | 28.040   | 0.0055   |
| Septic shock                            | overall       | 1.191  | 1.055   | 1.339    | 0.004    |
|                                         | low vs medium | 1.894  | 1.101   | 3.276    | 0.0209   |
|                                         | low vs high   | 2.210  | 1.290   | 3.813    | 0.0039   |
| pulmonary embolism                      | overall       | 1.204  | 1.074   | 1.347    | 0.0013   |
|                                         | low vs medium | 1.210  | 0.699   | 2.065    | 0.4881   |
|                                         | low vs high   | 2.167  | 1.334   | 3.534    | 0.0018   |
| deep vein thrombosis                    | overall       | 1.099  | 0.824   | 1.420    | 0.493    |
|                                         | low vs medium | 2.219  | 0.767   | 6.779    | 0.1422   |
|                                         | low vs high   | 0.920  | 0.193   | 3.505    | 0.9063   |
| myocardial infarction                   | overall       | 1.581  | 1.202   | 2.079    | 0.0009   |
|                                         | low vs medium | 6.644  | 0.979   | 130.177  | 0.0907   |
|                                         | low vs high   | 14.993 | 2.738   | 278.625  | 0.0108   |
| myocardial injury                       | overall       | 1.457  | 1.324   | 1.609    | < 0.0001 |
|                                         | low vs medium | 2.743  | 1.728   | 4.441    | < 0.0001 |
|                                         | low vs high   | 4.601  | 2.955   | 7.339    | < 0.0001 |
| acute heart failure                     | overall       | 2.147  | 1.814   | 2.574    | < 0.0001 |
|                                         | low vs medium | 16.826 | 3.208   | 309.310  | 0.0072   |
|                                         | low vs high   | 61.523 | 13.148  | 1097.226 | < 0.0001 |
| stroke/TIA                              | overall       | 1.236  | 1.000   | 1.510    | 0.042    |
|                                         | low vs medium | 1.900  | 0.678   | 5.451    | 0.2179   |
|                                         | low vs high   | 2.944  | 1.150   | 8.053    | 0.0267   |
| complete respiratory failure            | overall       | 1.221  | 1.036   | 1.450    | 0.0192   |
|                                         | low vs medium | 0.703  | 0.306   | 1.609    | 0.4045   |
|                                         | low vs high   | 1.574  | 0.734   | 3.403    | 0.2443   |
| SIRS                                    | overall       | 1.026  | 0.930   | 1.127    | 0.6051   |
|                                         | low vs medium | 0.964  | 0.648   | 1.422    | 0.8563   |
|                                         | low vs high   | 1.022  | 0.682   | 1.515    | 0.9156   |
| Sepsis                                  | overall       | 1.363  | 1.034   | 1.774    | 0.0227   |
|                                         | low vs medium | 0.345  | 0.018   | 2.163    | 0.3333   |
|                                         | low vs high   | 3.220  | 1.057   | 10.807   | 0.0432   |
| Acute kidney injury                     | overall       | 1.354  | 1.235   | 1.484    | < 0.0001 |
|                                         | low vs medium | 2.826  | 1.797   | 4.507    | < 0.0001 |
|                                         | low vs high   | 4.010  | 2.590   | 6.323    | < 0.0001 |
| Acute liver dysfunction                 | overall       | 1.258  | 1.076   | 1.463    | 0.0033   |
|                                         | low vs medium | 2.473  | 1.127   | 5.691    | 0.0265   |
|                                         | low vs high   | 3.780  | 1.817   | 8.425    | 0.0006   |

| Endpoint – NON-DIABETIC COHORT | Comparison    | OR    | CI min. | CI max. | P value  |
|--------------------------------|---------------|-------|---------|---------|----------|
| MODS                           | overall       | 1.067 | 0.847   | 1.315   | 0.5619   |
|                                | low vs medium | 1.325 | 0.502   | 3.382   | 0.5564   |
|                                | low vs high   | 1.671 | 0.659   | 4.178   | 0.2679   |
| All bleedings                  | overall       | 1.153 | 1.014   | 1.304   | 0.0264   |
|                                | low vs medium | 0.844 | 0.455   | 1.512   | 0.5769   |
|                                | low vs high   | 1.602 | 0.949   | 2.688   | 0.0747   |
| Intracranial bleeding          | overall       | 1.152 | 0.857   | 1.503   | 0.3188   |
|                                | low vs medium | 0.548 | 0.080   | 2.388   | 0.4621   |
|                                | low vs high   | 2.167 | 0.715   | 6.771   | 0.167    |
| Respiratory tract bleeding     | overall       | 1.038 | 0.793   | 1.318   | 0.7708   |
|                                | low vs medium | 0.747 | 0.234   | 2.067   | 0.5905   |
|                                | low vs high   | 0.835 | 0.262   | 2.312   | 0.7394   |
| Upper-GI-tract bleeding        | overall       | 1.407 | 1.127   | 1.746   | 0.0021   |
|                                | low vs medium | 2.914 | 0.875   | 11.176  | 0.0893   |
|                                | low vs high   | 4.690 | 1.558   | 17.181  | 0.0094   |
| Lower-GI-tract-bleeding        | overall       | 1.105 | 0.666   | 1.679   | 0.6639   |
|                                | low vs medium | 4.972 | 0.635   | 100.678 | 0.1654   |
|                                | low vs high   | 3.695 | 0.353   | 79.639  | 0.2865   |
| Urinary tract bleeding         | overall       | 1.378 | 1.009   | 1.851   | 0.0357   |
|                                | low vs medium | 0.411 | 0.021   | 2.788   | 0.4269   |
|                                | low vs high   | 2.787 | 0.792   | 10.952  | 0.1139   |
| Pneumonia                      | overall       | 1.333 | 1.253   | 1.421   | < 0.0001 |
|                                | low vs medium | 2.704 | 2.137   | 3.429   | < 0.0001 |
|                                | low vs high   | 3.133 | 2.449   | 4.021   | < 0.0001 |

**Suppl. Table S10.** Components of C<sub>2</sub>HES<sub>T</sub> score and the risk of outcomes in univariate Cox proportional hazard model (all-cause death) and competing risk regression model (other outcomes) in diabetes cohort.

| Endpoint – DIABETIC COHORT              | Component               | OR    | CI min. | CI max. | P value  |
|-----------------------------------------|-------------------------|-------|---------|---------|----------|
| End of hospitalization - death          | Coronary artery disease | 2.504 | 1.450   | 4.322   | 0.001    |
|                                         | COPD                    | 0.802 | 0.270   | 2.088   | 0.6684   |
|                                         | Age>75                  | 3.014 | 1.912   | 4.780   | < 0.0001 |
|                                         | Thyroid disease         | 0.431 | 0.191   | 0.887   | 0.0304   |
|                                         | Hypertension            | 0.541 | 0.312   | 0.950   | 0.0299   |
|                                         | HFrEF                   | 1.118 | 0.638   | 1.927   | 0.6919   |
| End of hospitalization - rehabilitation | Coronary artery disease | 1.184 | 0.590   | 2.282   | 0.6234   |
|                                         | COPD                    | 1.441 | 0.455   | 3.819   | 0.4927   |
|                                         | Age>75                  | 0.597 | 0.320   | 1.069   | 0.0925   |
|                                         | Thyroid disease         | 1.712 | 0.813   | 3.393   | 0.1372   |
|                                         | Hypertension            | 1.802 | 0.883   | 4.084   | 0.1277   |
|                                         | HFrEF                   | 0.808 | 0.391   | 1.591   | 0.549    |
| End of hospitalization - full recovery  | Coronary artery disease | 0.608 | 0.366   | 0.998   | 0.051    |
|                                         | COPD                    | 0.639 | 0.261   | 1.477   | 0.306    |
|                                         | Age>75                  | 0.480 | 0.319   | 0.718   | 0.0004   |
|                                         | Thyroid disease         | 1.201 | 0.685   | 2.106   | 0.5216   |
|                                         | Hypertension            | 1.056 | 0.656   | 1.703   | 0.8234   |
|                                         | HFrEF                   | 0.934 | 0.573   | 1.521   | 0.7843   |
| All-cause shock                         | Coronary artery disease | 0.895 | 0.419   | 1.807   | 0.7654   |
|                                         | COPD                    | 0.496 | 0.077   | 1.785   | 0.3575   |
|                                         | Age>75                  | 0.628 | 0.326   | 1.157   | 0.1476   |
|                                         | Thyroid disease         | 0.880 | 0.346   | 1.949   | 0.7685   |
|                                         | Hypertension            | 0.788 | 0.408   | 1.609   | 0.4929   |
|                                         | HFrEF                   | 1.832 | 0.913   | 3.591   | 0.0815   |
| Hypovolemic shock                       | Coronary artery disease | NA    | NA      | NA      | NA       |
|                                         | COPD                    | 3.577 | 0.175   | 26.205  | 0.2716   |
|                                         | Age>75                  | NA    | NA      | NA      | NA       |
|                                         | Thyroid disease         | 3.874 | 0.763   | 16.190  | 0.0719   |

| Endpoint – DIABETIC COHORT   | Component               | OR    | CI min. | CI max. | P value  |
|------------------------------|-------------------------|-------|---------|---------|----------|
|                              | Hypertension            | 0.328 | 0.071   | 1.506   | 0.1399   |
|                              | HFrEF                   | 2.842 | 0.372   | 15.153  | 0.2458   |
| Cardiogenic shock            | Coronary artery disease | 1.711 | 0.478   | 5.861   | 0.3946   |
|                              | COPD                    | 2.017 | 0.273   | 9.129   | 0.4141   |
|                              | Age>75                  | 2.953 | 0.956   | 10.108  | 0.0658   |
|                              | Thyroid disease         | 0.656 | 0.089   | 2.817   | 0.6192   |
|                              | Hypertension            | 0.398 | 0.117   | 1.581   | 0.1544   |
|                              | HFrEF                   | 3.055 | 0.867   | 11.051  | 0.0809   |
| Septic shock                 | Coronary artery disease | 0.854 | 0.366   | 1.844   | 0.6994   |
|                              | COPD                    | 0.308 | 0.017   | 1.548   | 0.2579   |
|                              | Age>75                  | 0.487 | 0.227   | 0.968   | 0.0497   |
|                              | Thyroid disease         | 0.796 | 0.264   | 1.949   | 0.647    |
|                              | Hypertension            | 1.283 | 0.596   | 3.090   | 0.5476   |
| pulmonary embolism           | HFrEF                   | 1.490 | 0.681   | 3.120   | 0.3015   |
|                              | Coronary artery disease | 0.327 | 0.050   | 1.226   | 0.1512   |
|                              | COPD                    | 0.864 | 0.047   | 4.505   | 0.8891   |
|                              | Age>75                  | 1.180 | 0.480   | 2.743   | 0.7065   |
|                              | Thyroid disease         | 0.642 | 0.101   | 2.283   | 0.5572   |
|                              | Hypertension            | 1.369 | 0.497   | 4.836   | 0.5787   |
|                              | HFrEF                   | 0.783 | 0.211   | 2.293   | 0.681    |
| deep vein thrombosis         | Coronary artery disease | NA    | NA      | NA      | NA       |
|                              | COPD                    | NA    | NA      | NA      | NA       |
|                              | Age>75                  | 1.117 | 0.051   | 11.866  | 0.9284   |
|                              | Thyroid disease         | NA    | NA      | NA      | NA       |
|                              | Hypertension            | NA    | NA      | NA      | NA       |
|                              | HFrEF                   | NA    | NA      | NA      | NA       |
| myocardial infarction        | Coronary artery disease | 0.327 | 0.050   | 1.226   | 0.1512   |
|                              | COPD                    | 0.864 | 0.047   | 4.505   | 0.8891   |
|                              | Age>75                  | 1.180 | 0.480   | 2.743   | 0.7065   |
|                              | Thyroid disease         | 0.642 | 0.101   | 2.283   | 0.5572   |
|                              | Hypertension            | 1.369 | 0.497   | 4.836   | 0.5787   |
|                              | HFrEF                   | 0.783 | 0.211   | 2.293   | 0.681    |
| myocardial injury            | Coronary artery disease | 1.269 | 0.297   | 4.778   | 0.7316   |
|                              | COPD                    | NA    | NA      | NA      | NA       |
|                              | Age>75                  | 0.731 | 0.184   | 2.494   | 0.629    |
|                              | Thyroid disease         | 0.565 | 0.030   | 3.050   | 0.591    |
|                              | Hypertension            | 0.511 | 0.137   | 2.445   | 0.3447   |
|                              | HFrEF                   | 4.048 | 1.051   | 15.611  | 0.0391   |
| acute heart failure          | Coronary artery disease | 0.848 | 0.451   | 1.561   | 0.6023   |
|                              | COPD                    | 0.952 | 0.307   | 2.698   | 0.9276   |
|                              | Age>75                  | 1.590 | 0.950   | 2.656   | 0.0766   |
|                              | Thyroid disease         | 0.482 | 0.198   | 1.074   | 0.0873   |
|                              | Hypertension            | 0.948 | 0.475   | 1.964   | 0.8829   |
|                              | HFrEF                   | 2.121 | 1.170   | 3.876   | 0.0136   |
| stroke/TIA                   | Coronary artery disease | 1.863 | 0.806   | 4.249   | 0.1406   |
|                              | COPD                    | 0.632 | 0.090   | 2.703   | 0.5822   |
|                              | Age>75                  | 5.580 | 2.483   | 13.820  | < 0.0001 |
|                              | Thyroid disease         | 0.845 | 0.256   | 2.338   | 0.7621   |
|                              | Hypertension            | 1.188 | 0.405   | 4.380   | 0.7709   |
|                              | HFrEF                   | 4.984 | 2.182   | 11.862  | 0.0002   |
| complete respiratory failure | Coronary artery disease | 0.587 | 0.084   | 2.499   | 0.5208   |
|                              | COPD                    | 1.560 | 0.083   | 8.678   | 0.6781   |
|                              | Age>75                  | 2.080 | 0.685   | 6.317   | 0.1876   |
|                              | Thyroid disease         | 0.524 | 0.028   | 2.766   | 0.5405   |
|                              | Hypertension            | 1.370 | 0.357   | 9.007   | 0.687    |
|                              | HFrEF                   | 0.851 | 0.171   | 3.147   | 0.8227   |
| pneumonia                    | Coronary artery disease | 1.693 | 0.601   | 5.016   | 0.3253   |
|                              | COPD                    | 0.934 | 0.225   | 4.172   | 0.925    |

| Endpoint – DIABETIC COHORT | Component               | OR     | CI min. | CI max. | P value |
|----------------------------|-------------------------|--------|---------|---------|---------|
|                            | Age>75                  | 1.498  | 0.611   | 3.751   | 0.3793  |
|                            | Thyroid disease         | 1.800  | 0.524   | 7.057   | 0.3672  |
|                            | Hypertension            | 2.252  | 0.761   | 7.041   | 0.1474  |
|                            | HFrEF                   | 1.265  | 0.425   | 3.895   | 0.6736  |
| SIRS                       | Coronary artery disease | 1.058  | 0.503   | 2.122   | 0.8777  |
|                            | COPD                    | 0.897  | 0.205   | 2.761   | 0.8655  |
|                            | Age>75                  | 1.077  | 0.586   | 1.934   | 0.8079  |
|                            | Thyroid disease         | 0.431  | 0.126   | 1.121   | 0.1224  |
|                            | Hypertension            | 0.767  | 0.391   | 1.604   | 0.4589  |
|                            | HFrEF                   | 1.608  | 0.797   | 3.156   | 0.1742  |
| sepsis                     | Coronary artery disease | 0.859  | 0.100   | 5.006   | 0.8738  |
|                            | COPD                    | 3.526  | 0.151   | 37.012  | 0.3271  |
|                            | Age>75                  | 1.647  | 0.332   | 8.237   | 0.5309  |
|                            | Thyroid disease         | NA     | NA      | NA      | NA      |
|                            | Hypertension            | 0.477  | 0.090   | 3.570   | 0.4055  |
|                            | HFrEF                   | 2.272  | 0.393   | 12.257  | 0.3355  |
| acute kidney injury        | Coronary artery disease | 1.959  | 1.095   | 3.461   | 0.0216  |
|                            | COPD                    | 1.951  | 0.752   | 4.674   | 0.1466  |
|                            | Age>75                  | 1.415  | 0.857   | 2.318   | 0.1705  |
|                            | Thyroid disease         | 0.555  | 0.230   | 1.186   | 0.1548  |
|                            | Hypertension            | 1.338  | 0.702   | 2.736   | 0.3974  |
|                            | HFrEF                   | 1.155  | 0.634   | 2.060   | 0.6296  |
| acute liver dysfunction    | Coronary artery disease | 1.075  | 0.298   | 3.395   | 0.9055  |
|                            | COPD                    | 0.771  | 0.040   | 4.417   | 0.8122  |
|                            | Age>75                  | 1.827  | 0.667   | 4.994   | 0.2337  |
|                            | Thyroid disease         | 1.169  | 0.255   | 3.841   | 0.8162  |
|                            | Hypertension            | 0.362  | 0.130   | 1.098   | 0.0573  |
|                            | HFrEF                   | 2.087  | 0.642   | 6.427   | 0.2054  |
| MODS                       | Coronary artery disease | 1.542  | 0.363   | 6.719   | 0.5527  |
|                            | COPD                    | NA     | NA      | NA      | NA      |
|                            | Age>75                  | 0.244  | 0.035   | 1.070   | 0.0903  |
|                            | Thyroid disease         | NA     | NA      | NA      | NA      |
|                            | Hypertension            | 0.412  | 0.076   | 3.106   | 0.3232  |
|                            | HFrEF                   | 21.436 | 4.221   | 166.456 | 0.0007  |
| all bleedings              | Coronary artery disease | 0.971  | 0.372   | 2.305   | 0.949   |
|                            | COPD                    | 0.897  | 0.136   | 3.359   | 0.8895  |
|                            | Age>75                  | 0.963  | 0.443   | 1.999   | 0.9209  |
|                            | Thyroid disease         | 1.709  | 0.652   | 3.964   | 0.2379  |
|                            | Hypertension            | 0.792  | 0.354   | 1.955   | 0.5883  |
|                            | HFrEF                   | 1.301  | 0.526   | 3.020   | 0.5516  |
| intracranial bleeding      | Coronary artery disease | 1.293  | 0.066   | 8.421   | 0.8177  |
|                            | COPD                    | NA     | NA      | NA      | NA      |
|                            | Age>75                  | 1.184  | 0.161   | 6.270   | 0.848   |
|                            | Thyroid disease         | 1.592  | 0.081   | 10.470  | 0.6775  |
|                            | Hypertension            | 1.423  | 0.217   | 27.913  | 0.7522  |
|                            | HFrEF                   | NA     | NA      | NA      | NA      |
| respiratory tract bleeding | Coronary artery disease | 1.392  | 0.331   | 5.061   | 0.6275  |
|                            | COPD                    | NA     | NA      | NA      | NA      |
|                            | Age>75                  | 0.263  | 0.039   | 1.046   | 0.0938  |
|                            | Thyroid disease         | 2.195  | 0.473   | 7.630   | 0.2511  |
|                            | Hypertension            | 0.702  | 0.192   | 3.336   | 0.6151  |
|                            | HFrEF                   | 2.629  | 0.674   | 9.569   | 0.1468  |
| upper-GI-tract bleeding    | Coronary artery disease | NA     | NA      | NA      | NA      |
|                            | COPD                    | 1.916  | 0.091   | 12.720  | 0.5743  |
|                            | Age>75                  | 1.183  | 0.281   | 4.358   | 0.8049  |
|                            | Thyroid disease         | 2.536  | 0.521   | 9.464   | 0.1932  |
|                            | Hypertension            | 0.294  | 0.082   | 1.081   | 0.0556  |
|                            | HFrEF                   | 2.199  | 0.426   | 9.070   | 0.2967  |

| Endpoint – DIABETIC COHORT | Component               | OR     | CI min. | CI max. | P value |
|----------------------------|-------------------------|--------|---------|---------|---------|
| lower-GI-tract-bleeding    | Coronary artery disease | 12.993 | 1.152   | 291.830 | 0.0422  |
|                            | COPD                    | NA     | NA      | NA      | NA      |
|                            | Age>75                  | 4.394  | 0.385   | 98.367  | 0.2408  |
|                            | Thyroid disease         | 2.676  | 0.111   | 31.874  | 0.4513  |
|                            | Hypertension            | 0.434  | 0.036   | 10.223  | 0.5196  |
|                            | HFrEF                   | NA     | NA      | NA      | NA      |
| urinary tract bleeding     | Coronary artery disease | 0.436  | 0.020   | 3.285   | 0.4861  |
|                            | COPD                    | 2.777  | 0.134   | 19.292  | 0.378   |
|                            | Age>75                  | 1.466  | 0.274   | 7.037   | 0.6307  |
|                            | Thyroid disease         | 2.536  | 0.339   | 12.702  | 0.2892  |
|                            | Hypertension            | 0.656  | 0.133   | 4.781   | 0.6261  |
|                            | HFrEF                   | 1.255  | 0.144   | 7.291   | 0.813   |
| pneumonia                  | Coronary artery disease | 0.828  | 0.505   | 1.364   | 0.4553  |
|                            | COPD                    | 1.361  | 0.587   | 3.429   | 0.4878  |
|                            | Age>75                  | 1.054  | 0.704   | 1.586   | 0.7983  |
|                            | Thyroid disease         | 0.937  | 0.537   | 1.659   | 0.8194  |
|                            | Hypertension            | 1.591  | 0.992   | 2.547   | 0.053   |
|                            | HFrEF                   | 1.277  | 0.780   | 2.116   | 0.3355  |

| Endpoint – NON-DIABETIC COHORT          | Component               | OR    | CI min. | CI max. | P value  |
|-----------------------------------------|-------------------------|-------|---------|---------|----------|
| End of hospitalization - death          | Coronary artery disease | 2.121 | 1.300   | 3.411   | 0.0022   |
|                                         | COPD                    | 1.033 | 0.463   | 2.142   | 0.9342   |
|                                         | Age>75                  | 2.450 | 1.742   | 3.430   | < 0.0001 |
|                                         | Thyroid disease         | 0.439 | 0.220   | 0.801   | 0.0118   |
|                                         | Hypertension            | 1.976 | 1.413   | 2.765   | < 0.0001 |
|                                         | HFrEF                   | 2.446 | 1.544   | 3.841   | 0.0001   |
| End of hospitalization - rehabilitation | Coronary artery disease | 0.422 | 0.166   | 0.921   | 0.0452   |
|                                         | COPD                    | 2.242 | 0.975   | 4.691   | 0.0416   |
|                                         | Age>75                  | 0.639 | 0.404   | 0.983   | 0.0482   |
|                                         | Thyroid disease         | 1.079 | 0.630   | 1.759   | 0.7695   |
|                                         | Hypertension            | 1.259 | 0.895   | 1.761   | 0.1809   |
|                                         | HFrEF                   | 1.193 | 0.602   | 2.228   | 0.5942   |
| End of hospitalization - full recovery  | Coronary artery disease | 0.658 | 0.424   | 1.021   | 0.062    |
|                                         | COPD                    | 0.594 | 0.308   | 1.126   | 0.1134   |
|                                         | Age>75                  | 0.378 | 0.290   | 0.491   | < 0.0001 |
|                                         | Thyroid disease         | 1.665 | 1.145   | 2.462   | 0.0089   |
|                                         | Hypertension            | 0.744 | 0.591   | 0.939   | 0.0122   |
|                                         | HFrEF                   | 0.573 | 0.375   | 0.871   | 0.0095   |
| All-cause shock                         | Coronary artery disease | 1.022 | 0.495   | 1.971   | 0.951    |
|                                         | COPD                    | 0.802 | 0.233   | 2.102   | 0.6876   |
|                                         | Age>75                  | 0.675 | 0.405   | 1.089   | 0.1186   |
|                                         | Thyroid disease         | 0.717 | 0.342   | 1.347   | 0.3355   |
|                                         | Hypertension            | 2.280 | 1.522   | 3.422   | < 0.0001 |
|                                         | HFrEF                   | 1.949 | 1.034   | 3.549   | 0.0333   |
| Hypovolemic shock                       | Coronary artery disease | NA    | NA      | NA      | NA       |
|                                         | COPD                    | 1.269 | 0.069   | 6.604   | 0.8205   |
|                                         | Age>75                  | 1.744 | 0.674   | 4.235   | 0.2309   |
|                                         | Thyroid disease         | 1.170 | 0.272   | 3.480   | 0.8024   |
|                                         | Hypertension            | 1.433 | 0.596   | 3.386   | 0.4132   |
|                                         | HFrEF                   | 2.330 | 0.623   | 7.070   | 0.1623   |
| Cardiogenic shock                       | Coronary artery disease | 1.572 | 0.411   | 5.410   | 0.4858   |
|                                         | COPD                    | 3.340 | 0.686   | 12.100  | 0.0903   |
|                                         | Age>75                  | 1.697 | 0.583   | 4.796   | 0.3191   |
|                                         | Thyroid disease         | 0.514 | 0.028   | 2.650   | 0.526    |
|                                         | Hypertension            | 0.988 | 0.342   | 2.883   | 0.9819   |
|                                         | HFrEF                   | 5.808 | 1.674   | 19.682  | 0.0048   |
| Septic shock                            | Coronary artery disease | 1.392 | 0.609   | 2.915   | 0.4044   |



| Endpoint – NON-DIABETIC COHORT | Component               | OR     | CI min. | CI max. | P value  |
|--------------------------------|-------------------------|--------|---------|---------|----------|
|                                | COPD                    | 0.563  | 0.089   | 1.946   | 0.4425   |
|                                | Age>75                  | 0.459  | 0.233   | 0.838   | 0.0161   |
|                                | Thyroid disease         | 0.686  | 0.281   | 1.431   | 0.3578   |
|                                | Hypertension            | 2.954  | 1.842   | 4.770   | < 0.0001 |
| pulmonary embolism             | HFrEF                   | 1.209  | 0.524   | 2.565   | 0.6372   |
|                                | Coronary artery disease | 0.707  | 0.272   | 1.594   | 0.4353   |
|                                | COPD                    | 0.883  | 0.207   | 2.566   | 0.8406   |
|                                | Age>75                  | 0.946  | 0.544   | 1.589   | 0.8388   |
|                                | Thyroid disease         | 0.471  | 0.163   | 1.074   | 0.1098   |
|                                | Hypertension            | 1.603  | 1.013   | 2.523   | 0.0423   |
|                                | HFrEF                   | 1.876  | 0.894   | 3.711   | 0.0813   |
|                                |                         |        |         |         |          |
| deep vein thrombosis           | Coronary artery disease | 1.195  | 0.153   | 6.043   | 0.844    |
|                                | COPD                    | 1.929  | 0.100   | 11.401  | 0.5493   |
|                                | Age>75                  | 0.682  | 0.145   | 2.353   | 0.5787   |
|                                | Thyroid disease         | 1.313  | 0.204   | 4.805   | 0.7218   |
|                                | Hypertension            | 0.745  | 0.227   | 2.189   | 0.6052   |
|                                | HFrEF                   | 2.838  | 0.488   | 12.584  | 0.2007   |
| myocardial infarction          | Coronary artery disease | 0.652  | 0.252   | 1.466   | 0.335    |
|                                | COPD                    | 0.850  | 0.200   | 2.466   | 0.7931   |
|                                | Age>75                  | 0.936  | 0.544   | 1.554   | 0.8027   |
|                                | Thyroid disease         | 0.541  | 0.207   | 1.164   | 0.1554   |
|                                | Hypertension            | 1.441  | 0.921   | 2.237   | 0.1062   |
|                                | HFrEF                   | 2.035  | 0.993   | 3.956   | 0.0426   |
| myocardial injury              | Coronary artery disease | 1.061  | 0.148   | 4.792   | 0.9439   |
|                                | COPD                    | NA     | NA      | NA      | NA       |
|                                | Age>75                  | 2.149  | 0.612   | 7.322   | 0.2196   |
|                                | Thyroid disease         | 0.635  | 0.034   | 3.344   | 0.6667   |
|                                | Hypertension            | 1.774  | 0.510   | 6.541   | 0.3696   |
|                                | HFrEF                   | 3.351  | 0.755   | 13.261  | 0.0918   |
| acute heart failure            | Coronary artery disease | 1.793  | 1.015   | 3.123   | 0.041    |
|                                | COPD                    | 1.340  | 0.586   | 2.929   | 0.4719   |
|                                | Age>75                  | 2.324  | 1.604   | 3.358   | < 0.0001 |
|                                | Thyroid disease         | 0.954  | 0.520   | 1.672   | 0.8727   |
|                                | Hypertension            | 1.208  | 0.839   | 1.735   | 0.3069   |
|                                | HFrEF                   | 2.173  | 1.280   | 3.663   | 0.0037   |
| stroke/TIA                     | Coronary artery disease | 1.035  | 0.443   | 2.319   | 0.9355   |
|                                | COPD                    | 0.458  | 0.068   | 1.819   | 0.3293   |
|                                | Age>75                  | 2.389  | 1.158   | 4.989   | 0.0189   |
|                                | Thyroid disease         | 0.305  | 0.047   | 1.121   | 0.1235   |
|                                | Hypertension            | 0.995  | 0.454   | 2.197   | 0.9893   |
|                                | HFrEF                   | 29.622 | 13.006  | 71.493  | < 0.0001 |
| complete respiratory failure   | Coronary artery disease | 0.790  | 0.119   | 3.029   | 0.765    |
|                                | COPD                    | NA     | 0.000   | NA      | NA       |
|                                | Age>75                  | 1.690  | 0.671   | 4.004   | 0.2447   |
|                                | Thyroid disease         | 0.664  | 0.105   | 2.295   | 0.5835   |
|                                | Hypertension            | 2.247  | 0.963   | 5.332   | 0.061    |
|                                | HFrEF                   | 1.050  | 0.227   | 3.542   | 0.9423   |
| pneumonia                      | Coronary artery disease | 1.937  | 0.735   | 5.324   | 0.1855   |
|                                | COPD                    | 0.886  | 0.204   | 3.989   | 0.8699   |
|                                | Age>75                  | 1.443  | 0.744   | 2.815   | 0.2786   |
|                                | Thyroid disease         | 0.532  | 0.168   | 1.560   | 0.2589   |
|                                | Hypertension            | 0.580  | 0.297   | 1.115   | 0.1054   |
|                                | HFrEF                   | 2.454  | 0.994   | 6.387   | 0.0561   |
| SIRS                           | Coronary artery disease | 0.812  | 0.377   | 1.608   | 0.5718   |
|                                | COPD                    | 1.684  | 0.664   | 3.721   | 0.2293   |
|                                | Age>75                  | 0.974  | 0.623   | 1.488   | 0.9058   |
|                                | Thyroid disease         | 0.673  | 0.336   | 1.220   | 0.2237   |

| Endpoint – NON-DIABETIC COHORT | Component               | OR     | CI min. | CI max. | P value  |
|--------------------------------|-------------------------|--------|---------|---------|----------|
|                                | Hypertension            | 0.811  | 0.555   | 1.172   | 0.2712   |
|                                | HFrEF                   | 1.582  | 0.826   | 2.896   | 0.1499   |
| sepsis                         | Coronary artery disease | 0.265  | 0.013   | 1.712   | 0.2399   |
|                                | COPD                    | 2.201  | 0.107   | 15.897  | 0.4974   |
|                                | Age>75                  | 1.049  | 0.261   | 3.773   | 0.9434   |
|                                | Thyroid disease         | 1.173  | 0.174   | 4.707   | 0.8417   |
|                                | Hypertension            | 1.710  | 0.465   | 6.418   | 0.4125   |
|                                | HFrEF                   | 6.983  | 1.623   | 29.784  | 0.0077   |
| acute kidney injury            | Coronary artery disease | 1.232  | 0.667   | 2.179   | 0.488    |
|                                | COPD                    | 0.709  | 0.236   | 1.720   | 0.488    |
|                                | Age>75                  | 1.176  | 0.774   | 1.760   | 0.4381   |
|                                | Thyroid disease         | 0.430  | 0.189   | 0.851   | 0.0262   |
|                                | Hypertension            | 2.536  | 1.740   | 3.711   | < 0.0001 |
|                                | HFrEF                   | 1.839  | 1.056   | 3.127   | 0.0274   |
| acute liver dysfunction        | Coronary artery disease | 1.069  | 0.371   | 2.648   | 0.8924   |
|                                | COPD                    | NA     | 0.000   | NA      | NA       |
|                                | Age>75                  | 1.476  | 0.755   | 2.800   | 0.2415   |
|                                | Thyroid disease         | 0.659  | 0.195   | 1.677   | 0.4362   |
|                                | Hypertension            | 2.393  | 1.271   | 4.594   | 0.0074   |
|                                | HFrEF                   | 1.770  | 0.715   | 4.029   | 0.1916   |
| MODS                           | Coronary artery disease | 0.256  | 0.013   | 1.458   | 0.2094   |
|                                | COPD                    | 2.439  | 0.370   | 9.279   | 0.2544   |
|                                | Age>75                  | 0.612  | 0.192   | 1.630   | 0.3599   |
|                                | Thyroid disease         | 0.710  | 0.113   | 2.450   | 0.6458   |
|                                | Hypertension            | 1.912  | 0.825   | 4.391   | 0.125    |
|                                | HFrEF                   | 2.406  | 0.619   | 7.502   | 0.1588   |
| all bleedings                  | Coronary artery disease | 1.178  | 0.488   | 2.583   | 0.6972   |
|                                | COPD                    | 0.697  | 0.110   | 2.427   | 0.6306   |
|                                | Age>75                  | 0.988  | 0.541   | 1.733   | 0.9669   |
|                                | Thyroid disease         | 2.035  | 1.063   | 3.653   | 0.023    |
|                                | Hypertension            | 1.297  | 0.779   | 2.142   | 0.3113   |
|                                | HFrEF                   | 2.085  | 0.956   | 4.309   | 0.0545   |
| intracranial bleeding          | Coronary artery disease | NA     | NA      | NA      | NA       |
|                                | COPD                    | NA     | NA      | NA      | NA       |
|                                | Age>75                  | 1.474  | 0.416   | 4.627   | 0.52     |
|                                | Thyroid disease         | NA     | NA      | NA      | NA       |
|                                | Hypertension            | 2.794  | 0.915   | 8.892   | 0.0709   |
|                                | HFrEF                   | 1.696  | 0.245   | 7.240   | 0.5212   |
| respiratory tract bleeding     | Coronary artery disease | 1.887  | 0.349   | 7.650   | 0.4123   |
|                                | COPD                    | 1.432  | 0.075   | 8.240   | 0.7417   |
|                                | Age>75                  | 0.136  | 0.007   | 0.700   | 0.0571   |
|                                | Thyroid disease         | 0.920  | 0.144   | 3.279   | 0.9128   |
|                                | Hypertension            | 1.340  | 0.494   | 3.425   | 0.5488   |
|                                | HFrEF                   | 1.982  | 0.361   | 8.267   | 0.3843   |
| upper-GI-tract bleeding        | Coronary artery disease | 1.715  | 0.424   | 5.655   | 0.4064   |
|                                | COPD                    | 1.074  | 0.057   | 5.814   | 0.947    |
|                                | Age>75                  | 2.084  | 0.783   | 5.373   | 0.1306   |
|                                | Thyroid disease         | 2.700  | 0.857   | 7.190   | 0.0616   |
|                                | Hypertension            | 1.728  | 0.656   | 4.738   | 0.2724   |
|                                | HFrEF                   | 1.735  | 0.469   | 5.637   | 0.3787   |
| lower-GI-tract-bleeding        | Coronary artery disease | NA     | NA      | NA      | NA       |
|                                | COPD                    | NA     | NA      | NA      | NA       |
|                                | Age>75                  | 1.150  | 0.057   | 8.042   | 0.9031   |
|                                | Thyroid disease         | 10.294 | 1.836   | 57.601  | 0.0054   |
|                                | Hypertension            | 0.771  | 0.098   | 4.348   | 0.7781   |
|                                | HFrEF                   | NA     | NA      | NA      | NA       |
| urinary tract bleeding         | Coronary artery disease | 1.546  | 0.200   | 8.040   | 0.6313   |

| Endpoint – NON-DIABETIC COHORT | Component               | OR    | CI min. | CI max. | P value  |
|--------------------------------|-------------------------|-------|---------|---------|----------|
|                                | COPD                    | NA    | NA      | NA      | NA       |
|                                | Age>75                  | 0.898 | 0.178   | 3.567   | 0.885    |
|                                | Thyroid disease         | 0.795 | 0.043   | 4.309   | 0.8293   |
|                                | Hypertension            | 1.593 | 0.411   | 6.181   | 0.4921   |
|                                | HFrEF                   | 3.527 | 0.600   | 17.218  | 0.1335   |
| pneumonia                      | Coronary artery disease | 0.962 | 0.618   | 1.509   | 0.8653   |
|                                | COPD                    | 1.902 | 0.964   | 4.034   | 0.0756   |
|                                | Age>75                  | 1.281 | 0.980   | 1.677   | 0.0706   |
|                                | Thyroid disease         | 1.251 | 0.887   | 1.773   | 0.2042   |
|                                | Hypertension            | 2.432 | 1.947   | 3.045   | < 0.0001 |
|                                | HFrEF                   | 1.376 | 0.892   | 2.151   | 0.1538   |
